# Supplementary material for: The complex genetic and molecular basis of a model quantitative trait
Source: PubMed Central journal article supplement — Mol Biol Cell. 2016 Jan 1;27(1):209–18. doi: 10.1091/mbc.E15-06-0408 (PMC4694759; doi:10.1091/mbc.e15-06-0408), 2016-01-01
Supplement: supp_E15-06-0408v1_Supplement_submit_12012015_new.pdf [file supp_E15-06-0408v1_Supplement_submit_12012015_new.pdf]

# Supplemental Materials

*Molecular Biology of the Cell*

Linder et al.

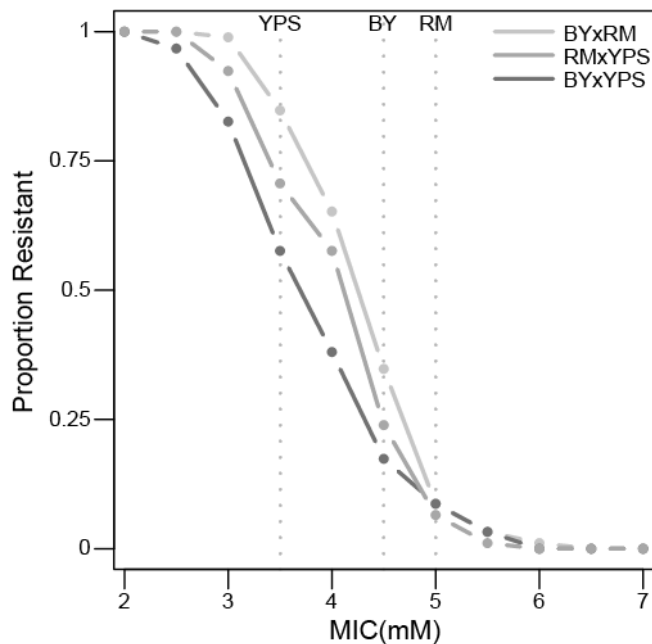

**Figure S1.** Distribution of hydrogen peroxide resistance among parents and cross progeny. YPS was most sensitive to hydrogen peroxide: the MIC of YPS was 3.5 mM, while BY and RM showed MICs of 4.5 and 5 mM, respectively (depicted as dashed vertical lines above). For each of the three pairwise crosses of the three strains, we generated 864 recombinants using random spore techniques (Methods). We screened these recombinants across six concentrations of hydrogen peroxide and found that the trait was transgressive in every cross. Furthermore, minimal and maximal trait values that were approximately the same were observed in each of the crosses (minima  $\approx$  2 mM and maxima  $\approx$  7 mM), although the proportion of progeny with intermediate phenotypes varied. These results suggest that BY, RM, and YPS each carry a mixture of resistance and sensitivity alleles.

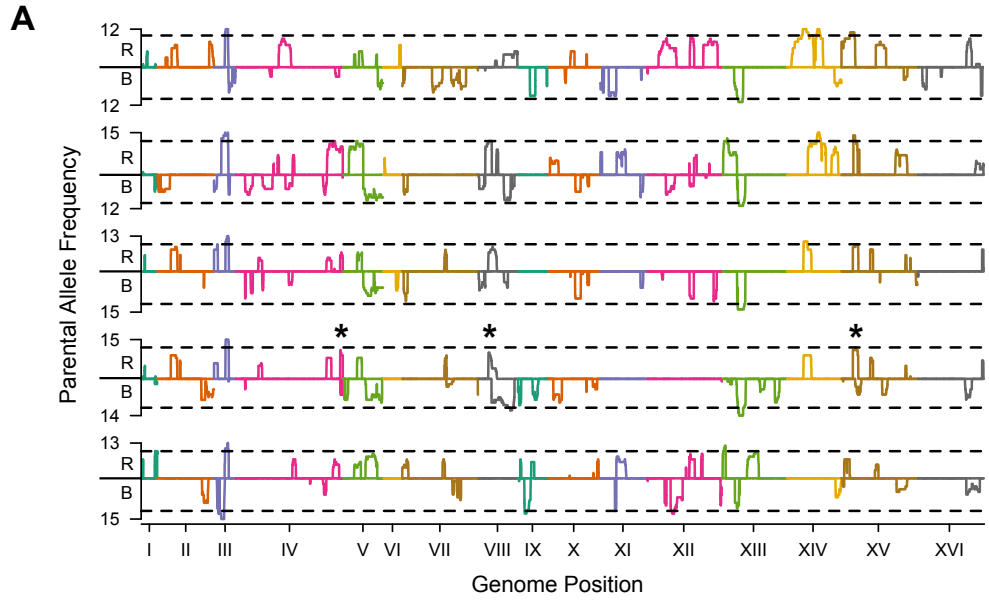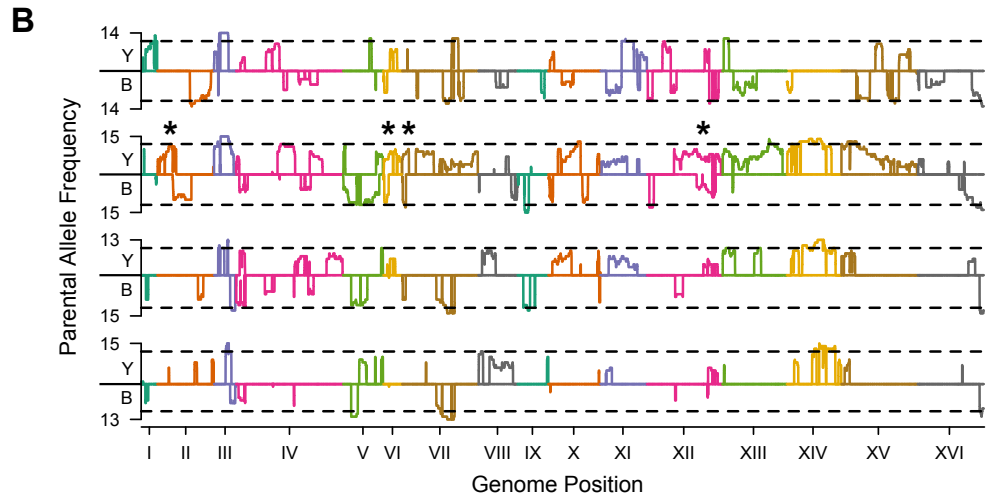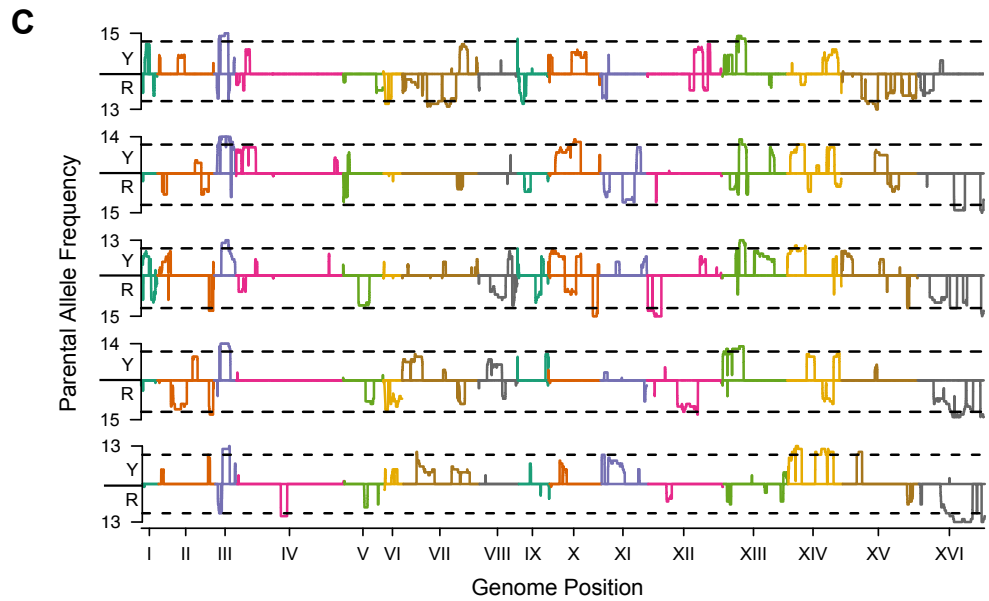

**Figure S2.** Genome-wide allele frequency plots of all families for each cross, with families from a cross ordered by their founding segregant. The BYxRM, BYxYPS, and RMxYPS crosses are shown in A, B, and C, respectively. Dashed horizontal lines represent nominal significance ( $p \leq 0.05$ ) in one-tailed binomial tests. The number of  $F_2B_3$  segregants that carry the non-backcross parental allele is depicted on the y-axis, with 'B', 'R', and 'Y' indicating BY, RM, and YPS, respectively. Regions supporting transient aneuploidy during early rounds of backcrossing are indicated with asterisks. These sites were identified because the sites segregate in both backcrosses derived from their founding segregant. Under a scenario in which aneuploidy does not occur, regions that segregate in one family derived from a given segregant should not segregate with the other family derived from that segregant.

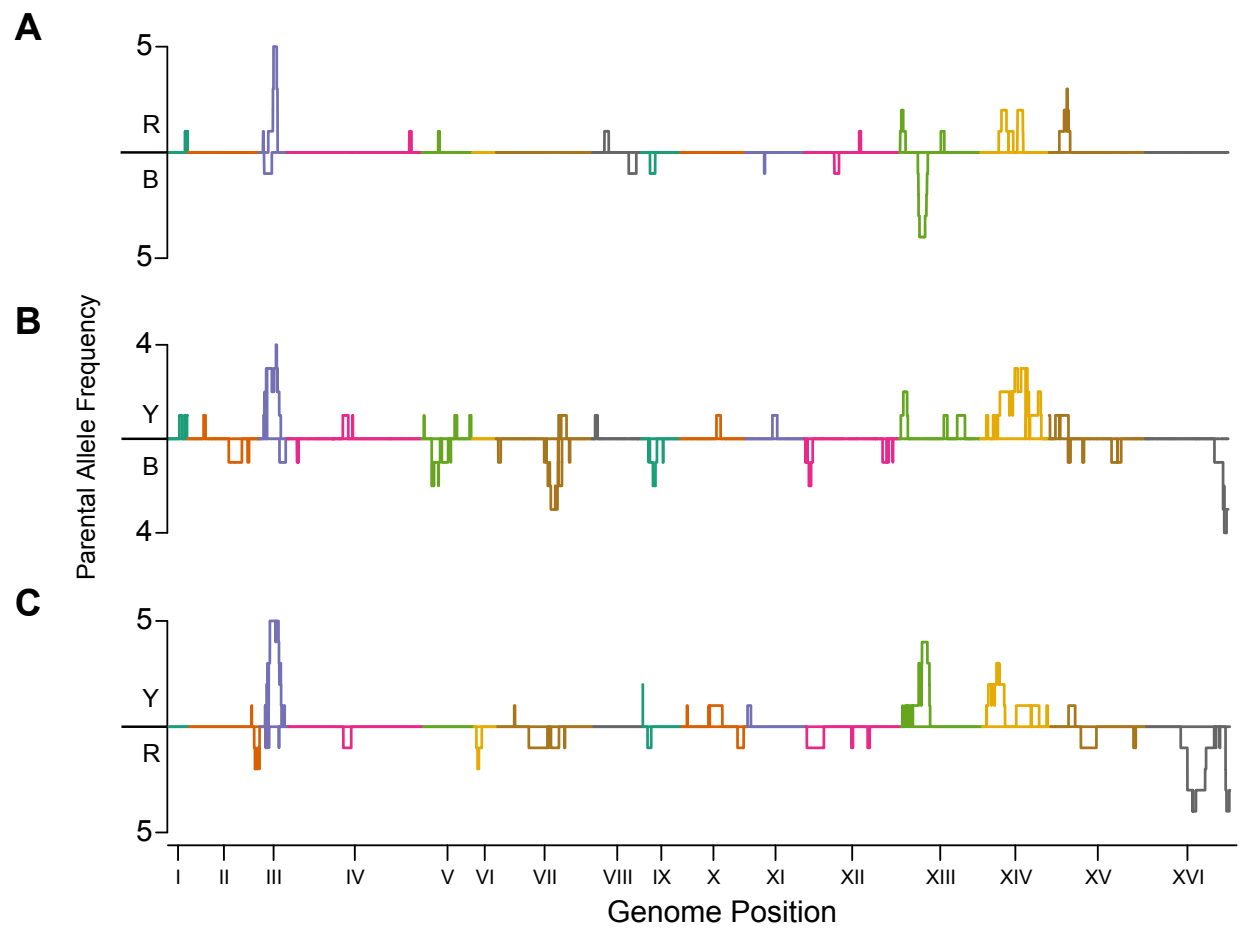

**Figure S3.** Detection of nominally significant loci ( $p \leq 0.05$ ) in multiple advanced backcross families and crosses. The BYxRM, BYxYPS, and RMxYPS crosses are shown in A, B, and C, respectively. The y-axis depicts the number of advanced backcross families that were significant at a given genomic position.

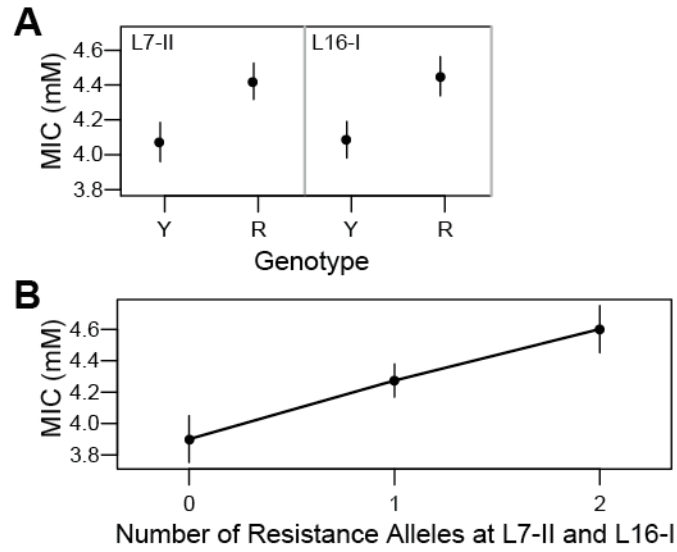

**Figure S4.** L7-II and L16-I act additively. 470 RMxYPS F<sub>2</sub> segregants were phenotyped and genotyped at L7-II and L16-I. The 95% confidence intervals of MIC for each genotype are shown in A, while the additive regression model for MIC as a function of haploid combinations of the two loci is provided in B.

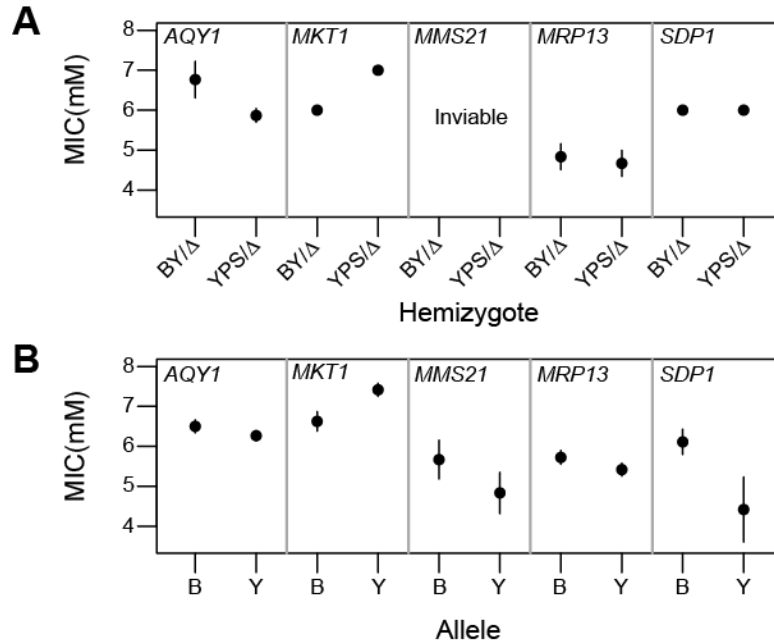

**Figure S5.** RH and allele replacement results for the five BYxYPS loci described in Figure 4. In A, RH successfully identified *AQY1* (Chromosome XVI) and *MKT1* (Chromosome XIV) as quantitative trait genes. In B, allele replacements confirmed that *AQY1* and *MKT1* are quantitative genes, and showed that *MMS21* (Chromosome V), *MRP13* (Chromosome VII), and *SDP1* (Chromosome IX) are causal. As we discuss in the main text, the causal variant at *SDP1* is located in the intergenic region between this gene and *POR2*. All plots show 95% confidence intervals for MIC, with ‘B’ and ‘Y’, indicating BY and YPS, respectively.

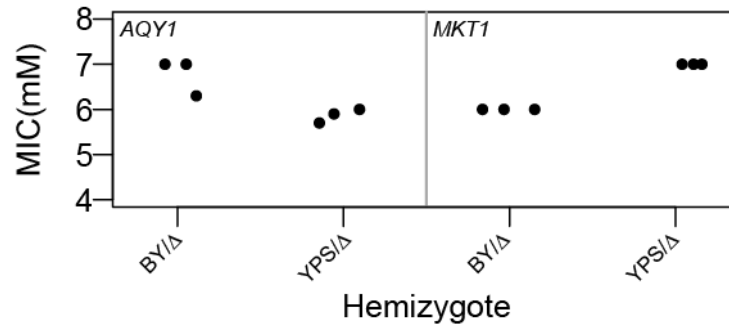

**Figure S6.** Raw data plotted for the RH results depicted in the previous figure.



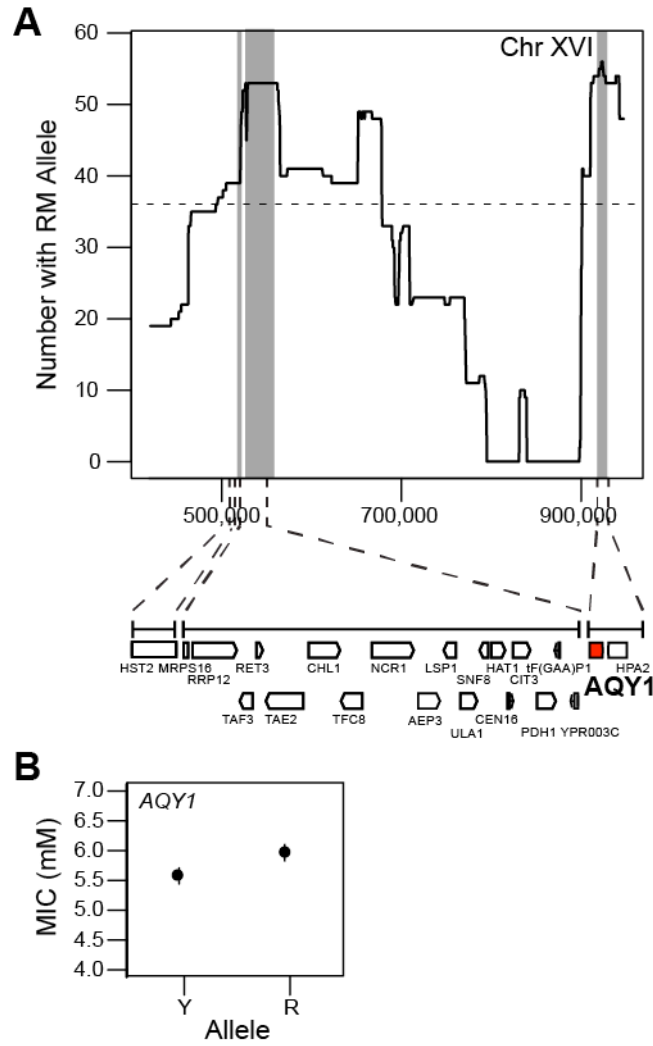

**Figure S7.** Cloning of *AQY1* in the RMxYPS cross. In A and B, allele replacements in a relevant RMxYPS  $F_2B_3$  segregant were used to show that *AQY1* is the causal gene underlying the locus at the distal end of Chromosome XVI. ‘R’ and ‘Y’ refer to RM and YPS, respectively. 95% confidence intervals for MIC are provided in B.

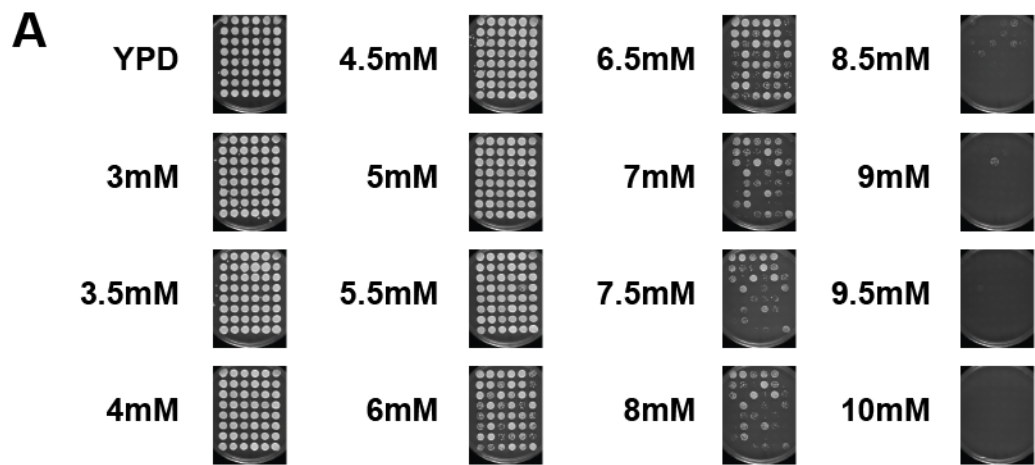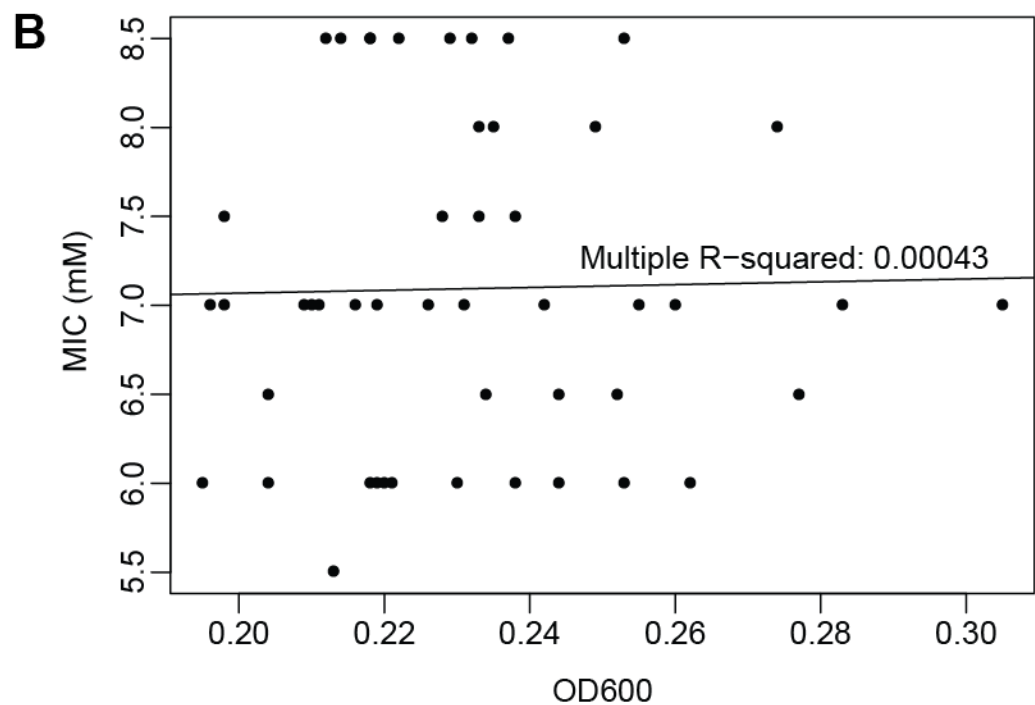

**Figure S8.** The correlation between MIC and OD600 values for 48 haploid strains. In A, a representative set of images depicting 48  $F_2B_3$  segregants that were pinned across a range of doses of hydrogen peroxide is shown. The OD600 values of the cultures these strains were pinned from were measured just prior to pinning. As can be seen in B, for this experimental setup, there is virtually no correlation between the MIC of these strains and the OD600 values of the cultures they were pinned from.

**Table S1.** Phenotype data for all F<sub>2</sub> progenitor strains as well as all F<sub>2</sub>B<sub>3</sub> segregants used in this study.

| Strain Name | Description                                                     | MIC (mM) |
|-------------|-----------------------------------------------------------------|----------|
| 2A4         | <b>BYxRM F<sub>2</sub></b><br>Families 1 and 6<br>progenitor    | 7.5      |
| 2C12        | <b>BYxRM F<sub>2</sub></b><br>Families 2 and 7<br>progenitor    | 7.5      |
| 4E12        | <b>BYxRM F<sub>2</sub></b><br>Families 3 and 8<br>progenitor    | 6.5      |
| 3C9         | <b>BYxRM F<sub>2</sub></b><br>Families 4 and 9<br>progenitor    | 6.5      |
| 3C11        | <b>BYxRM F<sub>2</sub></b><br>Families 5 and<br>10 progenitor   | 6.5      |
| 5H4         | <b>RMxYPS F<sub>2</sub></b><br>Families 11 and<br>16 progenitor | >8       |
| 1E11        | <b>RMxYPS F<sub>2</sub></b><br>Families 12 and<br>17 progenitor | 7.5      |
| 5E4         | <b>RMxYPS F<sub>2</sub></b><br>Families 13 and<br>18 progenitor | 7        |
| 4E12        | <b>RMxYPS F<sub>2</sub></b><br>Families 14 and<br>19 progenitor | 7        |
| 5C12        | <b>RMxYPS F<sub>2</sub></b><br>Families 15 and<br>20 progenitor | 7        |
| 8A5         | <b>BYxYPS F<sub>2</sub></b><br>Families 21 and<br>26 progenitor | 7        |
| 7H4         | <b>BYxYPS F<sub>2</sub></b><br>Families 22 and<br>28 progenitor | 7        |

|       |                                                                 |    |
|-------|-----------------------------------------------------------------|----|
| 8H3   | <b>BYxYPS F<sub>2</sub></b><br>Families 23 and<br>29 progenitor | 7  |
| 8A6   | <b>BYxYPS F<sub>2</sub></b><br>Families 24 and<br>27 progenitor | 8  |
| 7H12  | <b>BYxYPS F<sub>2</sub></b><br>Families 25 and<br>30 progenitor | 8  |
| 1bC2  | <b>BYxRMxBY F<sub>2</sub>B<sub>3</sub></b>                      | 7  |
| 1bD10 | <b>BYxRMxBY F<sub>2</sub>B<sub>3</sub></b>                      | 7  |
| 1bG5  | <b>BYxRMxBY F<sub>2</sub>B<sub>3</sub></b>                      | 7  |
| 1dC3  | <b>BYxRMxBY F<sub>2</sub>B<sub>3</sub></b>                      | 7  |
| 1dD9  | <b>BYxRMxBY F<sub>2</sub>B<sub>3</sub></b>                      | 7  |
| 1dE10 | <b>BYxRMxBY F<sub>2</sub>B<sub>3</sub></b>                      | 7  |
| 1dE12 | <b>BYxRMxBY F<sub>2</sub>B<sub>3</sub></b>                      | 7  |
| 1dF6  | <b>BYxRMxBY F<sub>2</sub>B<sub>3</sub></b>                      | 8  |
| 1gB11 | <b>BYxRMxBY F<sub>2</sub>B<sub>3</sub></b>                      | 6  |
| 1gB12 | <b>BYxRMxBY F<sub>2</sub>B<sub>3</sub></b>                      | 6  |
| 1gC11 | <b>BYxRMxBY F<sub>2</sub>B<sub>3</sub></b>                      | 6  |
| 1gC12 | <b>BYxRMxBY F<sub>2</sub>B<sub>3</sub></b>                      | 7  |
| 2aC8  | <b>BYxRMxBY F<sub>2</sub>B<sub>3</sub></b>                      | 6  |
| 2aC9  | <b>BYxRMxBY F<sub>2</sub>B<sub>3</sub></b>                      | 7  |
| 2aD11 | <b>BYxRMxBY F<sub>2</sub>B<sub>3</sub></b>                      | 7  |
| 2aE9  | <b>BYxRMxBY F<sub>2</sub>B<sub>3</sub></b>                      | 7  |
| 2aF9  | <b>BYxRMxBY F<sub>2</sub>B<sub>3</sub></b>                      | 7  |
| 2bD9  | <b>BYxRMxBY F<sub>2</sub>B<sub>3</sub></b>                      | 7  |
| 2bE12 | <b>BYxRMxBY F<sub>2</sub>B<sub>3</sub></b>                      | 7  |
| 2cD10 | <b>BYxRMxBY F<sub>2</sub>B<sub>3</sub></b>                      | 7  |
| 2cD12 | <b>BYxRMxBY F<sub>2</sub>B<sub>3</sub></b>                      | 7  |
| 2cF11 | <b>BYxRMxBY F<sub>2</sub>B<sub>3</sub></b>                      | 7  |
| 2gB11 | <b>BYxRMxBY F<sub>2</sub>B<sub>3</sub></b>                      | 7  |
| 2gE7  | <b>BYxRMxBY F<sub>2</sub>B<sub>3</sub></b>                      | 7  |
| 2gE8  | <b>BYxRMxBY F<sub>2</sub>B<sub>3</sub></b>                      | 7  |
| 2gE9  | <b>BYxRMxBY F<sub>2</sub>B<sub>3</sub></b>                      | 7  |
| 2gG11 | <b>BYxRMxBY F<sub>2</sub>B<sub>3</sub></b>                      | <8 |
| 3cC10 | <b>BYxRMxBY F<sub>2</sub>B<sub>3</sub></b>                      | 6  |

|       |                                            |    |
|-------|--------------------------------------------|----|
| 3cC11 | <b>BYxRMxBY F<sub>2</sub>B<sub>3</sub></b> | 6  |
| 3cC9  | <b>BYxRMxBY F<sub>2</sub>B<sub>3</sub></b> | 6  |
| 3cD10 | <b>BYxRMxBY F<sub>2</sub>B<sub>3</sub></b> | 6  |
| 3cD11 | <b>BYxRMxBY F<sub>2</sub>B<sub>3</sub></b> | 6  |
| 3cD12 | <b>BYxRMxBY F<sub>2</sub>B<sub>3</sub></b> | 6  |
| 3cD7  | <b>BYxRMxBY F<sub>2</sub>B<sub>3</sub></b> | 5  |
| 3cD8  | <b>BYxRMxBY F<sub>2</sub>B<sub>3</sub></b> | 5  |
| 3cD9  | <b>BYxRMxBY F<sub>2</sub>B<sub>3</sub></b> | 7  |
| 3dD9  | <b>BYxRMxBY F<sub>2</sub>B<sub>3</sub></b> | 6  |
| 3eA4  | <b>BYxRMxBY F<sub>2</sub>B<sub>3</sub></b> | 5  |
| 3eB7  | <b>BYxRMxBY F<sub>2</sub>B<sub>3</sub></b> | 6  |
| 3eC7  | <b>BYxRMxBY F<sub>2</sub>B<sub>3</sub></b> | 5  |
| 4aB5  | <b>BYxRMxBY F<sub>2</sub>B<sub>3</sub></b> | 6  |
| 4aC9  | <b>BYxRMxBY F<sub>2</sub>B<sub>3</sub></b> | 6  |
| 4aD9  | <b>BYxRMxBY F<sub>2</sub>B<sub>3</sub></b> | 6  |
| 4aE5  | <b>BYxRMxBY F<sub>2</sub>B<sub>3</sub></b> | 5  |
| 4aE9  | <b>BYxRMxBY F<sub>2</sub>B<sub>3</sub></b> | 6  |
| 4fA11 | <b>BYxRMxBY F<sub>2</sub>B<sub>3</sub></b> | 6  |
| 4fB10 | <b>BYxRMxBY F<sub>2</sub>B<sub>3</sub></b> | 7  |
| 4fB11 | <b>BYxRMxBY F<sub>2</sub>B<sub>3</sub></b> | 6  |
| 4fB12 | <b>BYxRMxBY F<sub>2</sub>B<sub>3</sub></b> | 5  |
| 4fC10 | <b>BYxRMxBY F<sub>2</sub>B<sub>3</sub></b> | 6  |
| 4gB11 | <b>BYxRMxBY F<sub>2</sub>B<sub>3</sub></b> | 6  |
| 4gE10 | <b>BYxRMxBY F<sub>2</sub>B<sub>3</sub></b> | 5  |
| 4gF10 | <b>BYxRMxBY F<sub>2</sub>B<sub>3</sub></b> | 5  |
| 4gF11 | <b>BYxRMxBY F<sub>2</sub>B<sub>3</sub></b> | 5  |
| 4gG5  | <b>BYxRMxBY F<sub>2</sub>B<sub>3</sub></b> | 6  |
| 5bB11 | <b>BYxRMxBY F<sub>2</sub>B<sub>3</sub></b> | <5 |
| 5bE4  | <b>BYxRMxBY F<sub>2</sub>B<sub>3</sub></b> | 6  |
| 5gA2  | <b>BYxRMxBY F<sub>2</sub>B<sub>3</sub></b> | 6  |
| 5gA6  | <b>BYxRMxBY F<sub>2</sub>B<sub>3</sub></b> | 5  |
| 5gB2  | <b>BYxRMxBY F<sub>2</sub>B<sub>3</sub></b> | 5  |
| 5gB5  | <b>BYxRMxBY F<sub>2</sub>B<sub>3</sub></b> | 5  |
| 5gD2  | <b>BYxRMxBY F<sub>2</sub>B<sub>3</sub></b> | 5  |
| 5gE2  | <b>BYxRMxBY F<sub>2</sub>B<sub>3</sub></b> | 6  |
| 5gE4  | <b>BYxRMxBY F<sub>2</sub>B<sub>3</sub></b> | 6  |
| 5gF1  | <b>BYxRMxBY F<sub>2</sub>B<sub>3</sub></b> | 5  |

|       |                                                |    |
|-------|------------------------------------------------|----|
| 5gF2  | <b>BYxRMxBY F<sub>2</sub>B<sub>3</sub></b>     | 6  |
| 5gG3  | <b>BYxRMxBY F<sub>2</sub>B<sub>3</sub></b>     | 5  |
| 5gG6  | <b>BYxRMxBY F<sub>2</sub>B<sub>3</sub></b>     | 5  |
| 6bC2  | <b>BYxRMxRM<br/>F<sub>2</sub>B<sub>3</sub></b> | 8  |
| 6bD10 | <b>BYxRMxRM<br/>F<sub>2</sub>B<sub>3</sub></b> | 8  |
| 6bD2  | <b>BYxRMxRM<br/>F<sub>2</sub>B<sub>3</sub></b> | 10 |
| 6bD4  | <b>BYxRMxRM<br/>F<sub>2</sub>B<sub>3</sub></b> | 9  |
| 6bD8  | <b>BYxRMxRM<br/>F<sub>2</sub>B<sub>3</sub></b> | 8  |
| 6bE8  | <b>BYxRMxRM<br/>F<sub>2</sub>B<sub>3</sub></b> | 10 |
| 6cB8  | <b>BYxRMxRM<br/>F<sub>2</sub>B<sub>3</sub></b> | 8  |
| 6dD11 | <b>BYxRMxRM<br/>F<sub>2</sub>B<sub>3</sub></b> | 10 |
| 6dE11 | <b>BYxRMxRM<br/>F<sub>2</sub>B<sub>3</sub></b> | 7  |
| 6dF10 | <b>BYxRMxRM<br/>F<sub>2</sub>B<sub>3</sub></b> | 9  |
| 6gF1  | <b>BYxRMxRM<br/>F<sub>2</sub>B<sub>3</sub></b> | 9  |
| 6gG11 | <b>BYxRMxRM<br/>F<sub>2</sub>B<sub>3</sub></b> | 9  |
| 7aE3  | <b>BYxRMxRM<br/>F<sub>2</sub>B<sub>3</sub></b> | 8  |
| 7aE8  | <b>BYxRMxRM<br/>F<sub>2</sub>B<sub>3</sub></b> | 8  |
| 7aG12 | <b>BYxRMxRM<br/>F<sub>2</sub>B<sub>3</sub></b> | 9  |
| 7aG9  | <b>BYxRMxRM<br/>F<sub>2</sub>B<sub>3</sub></b> | 8  |
| 7bE10 | <b>BYxRMxRM<br/>F<sub>2</sub>B<sub>3</sub></b> | 9  |
| 7bE11 | <b>BYxRMxRM<br/>F<sub>2</sub>B<sub>3</sub></b> | 8  |
| 7bE3  | <b>BYxRMxRM<br/>F<sub>2</sub>B<sub>3</sub></b> | 10 |
| 7bE4  | <b>BYxRMxRM</b>                                | 8  |

|       | <b>F<sub>2</sub>B<sub>3</sub></b>              |   |
|-------|------------------------------------------------|---|
| 7bE9  | <b>BYxRMxRM<br/>F<sub>2</sub>B<sub>3</sub></b> | 8 |
| 7bF11 | <b>BYxRMxRM<br/>F<sub>2</sub>B<sub>3</sub></b> | 7 |
| 7bF12 | <b>BYxRMxRM<br/>F<sub>2</sub>B<sub>3</sub></b> | 7 |
| 7bF9  | <b>BYxRMxRM<br/>F<sub>2</sub>B<sub>3</sub></b> | 8 |
| 8aD9  | <b>BYxRMxRM<br/>F<sub>2</sub>B<sub>3</sub></b> | 8 |
| 8aE9  | <b>BYxRMxRM<br/>F<sub>2</sub>B<sub>3</sub></b> | 8 |
| 8bB11 | <b>BYxRMxRM<br/>F<sub>2</sub>B<sub>3</sub></b> | 8 |
| 8bC11 | <b>BYxRMxRM<br/>F<sub>2</sub>B<sub>3</sub></b> | 8 |
| 8cB5  | <b>BYxRMxRM<br/>F<sub>2</sub>B<sub>3</sub></b> | 8 |
| 8cD5  | <b>BYxRMxRM<br/>F<sub>2</sub>B<sub>3</sub></b> | 8 |
| 8cE2  | <b>BYxRMxRM<br/>F<sub>2</sub>B<sub>3</sub></b> | 7 |
| 8cE3  | <b>BYxRMxRM<br/>F<sub>2</sub>B<sub>3</sub></b> | 7 |
| 8cE5  | <b>BYxRMxRM<br/>F<sub>2</sub>B<sub>3</sub></b> | 8 |
| 8eC10 | <b>BYxRMxRM<br/>F<sub>2</sub>B<sub>3</sub></b> | 8 |
| 8eD10 | <b>BYxRMxRM<br/>F<sub>2</sub>B<sub>3</sub></b> | 8 |
| 8eD3  | <b>BYxRMxRM<br/>F<sub>2</sub>B<sub>3</sub></b> | 8 |
| 8eE1  | <b>BYxRMxRM<br/>F<sub>2</sub>B<sub>3</sub></b> | 7 |
| 8eE2  | <b>BYxRMxRM<br/>F<sub>2</sub>B<sub>3</sub></b> | 7 |
| 8eE3  | <b>BYxRMxRM<br/>F<sub>2</sub>B<sub>3</sub></b> | 7 |
| 9aC11 | <b>BYxRMxRM<br/>F<sub>2</sub>B<sub>3</sub></b> | 9 |
| 9aC4  | <b>BYxRMxRM<br/>F<sub>2</sub>B<sub>3</sub></b> | 8 |

|       |                                                |     |
|-------|------------------------------------------------|-----|
| 9aC8  | <b>BYxRMxRM<br/>F<sub>2</sub>B<sub>3</sub></b> | 10  |
| 9aD10 | <b>BYxRMxRM<br/>F<sub>2</sub>B<sub>3</sub></b> | 9   |
| 9aD2  | <b>BYxRMxRM<br/>F<sub>2</sub>B<sub>3</sub></b> | 8   |
| 9aD9  | <b>BYxRMxRM<br/>F<sub>2</sub>B<sub>3</sub></b> | 9   |
| 9bC9  | <b>BYxRMxRM<br/>F<sub>2</sub>B<sub>3</sub></b> | 9   |
| 9bD8  | <b>BYxRMxRM<br/>F<sub>2</sub>B<sub>3</sub></b> | 9   |
| 9bE11 | <b>BYxRMxRM<br/>F<sub>2</sub>B<sub>3</sub></b> | 8   |
| 9bG8  | <b>BYxRMxRM<br/>F<sub>2</sub>B<sub>3</sub></b> | 9   |
| 9cE10 | <b>BYxRMxRM<br/>F<sub>2</sub>B<sub>3</sub></b> | 9   |
| 9cF11 | <b>BYxRMxRM<br/>F<sub>2</sub>B<sub>3</sub></b> | 9   |
| 9cF9  | <b>BYxRMxRM<br/>F<sub>2</sub>B<sub>3</sub></b> | 9   |
| 9cG8  | <b>BYxRMxRM<br/>F<sub>2</sub>B<sub>3</sub></b> | 9   |
| 10bH7 | <b>BYxRMxRM<br/>F<sub>2</sub>B<sub>3</sub></b> | 7   |
| 10cD9 | <b>BYxRMxRM<br/>F<sub>2</sub>B<sub>3</sub></b> | 7   |
| 10cE8 | <b>BYxRMxRM<br/>F<sub>2</sub>B<sub>3</sub></b> | 7   |
| 10cE9 | <b>BYxRMxRM<br/>F<sub>2</sub>B<sub>3</sub></b> | 8   |
| 10cF9 | <b>BYxRMxRM<br/>F<sub>2</sub>B<sub>3</sub></b> | 8   |
| 10eE2 | <b>BYxRMxRM<br/>F<sub>2</sub>B<sub>3</sub></b> | 8   |
| 10eE4 | <b>BYxRMxRM<br/>F<sub>2</sub>B<sub>3</sub></b> | 8.5 |
| 10eF1 | <b>BYxRMxRM<br/>F<sub>2</sub>B<sub>3</sub></b> | 7   |
| 10eF4 | <b>BYxRMxRM<br/>F<sub>2</sub>B<sub>3</sub></b> | 8   |
| 10eG3 | <b>BYxRMxRM</b>                                | 8   |



|        | <b>F<sub>2</sub>B<sub>3</sub></b>               |   |
|--------|-------------------------------------------------|---|
| 10gC8  | <b>BYxRMxRM<br/>F<sub>2</sub>B<sub>3</sub></b>  | 7 |
| 10gD7  | <b>BYxRMxRM<br/>F<sub>2</sub>B<sub>3</sub></b>  | 7 |
| 10gF7  | <b>BYxRMxRM<br/>F<sub>2</sub>B<sub>3</sub></b>  | 7 |
| 10gG7  | <b>BYxRMxRM<br/>F<sub>2</sub>B<sub>3</sub></b>  | 7 |
| 10gG9  | <b>BYxRMxRM<br/>F<sub>2</sub>B<sub>3</sub></b>  | 8 |
| 11aC12 | <b>RMxYPSxRM<br/>F<sub>2</sub>B<sub>3</sub></b> | 9 |
| 11aE11 | <b>RMxYPSxRM<br/>F<sub>2</sub>B<sub>3</sub></b> | 9 |
| 11bC2  | <b>RMxYPSxRM<br/>F<sub>2</sub>B<sub>3</sub></b> | 8 |
| 11bC5  | <b>RMxYPSxRM<br/>F<sub>2</sub>B<sub>3</sub></b> | 8 |
| 11bD4  | <b>RMxYPSxRM<br/>F<sub>2</sub>B<sub>3</sub></b> | 8 |
| 11dA4  | <b>RMxYPSxRM<br/>F<sub>2</sub>B<sub>3</sub></b> | 8 |
| 11dB2  | <b>RMxYPSxRM<br/>F<sub>2</sub>B<sub>3</sub></b> | 8 |
| 11dB3  | <b>RMxYPSxRM<br/>F<sub>2</sub>B<sub>3</sub></b> | 7 |
| 11dB4  | <b>RMxYPSxRM<br/>F<sub>2</sub>B<sub>3</sub></b> | 8 |
| 11dB5  | <b>RMxYPSxRM<br/>F<sub>2</sub>B<sub>3</sub></b> | 7 |
| 11dC2  | <b>RMxYPSxRM<br/>F<sub>2</sub>B<sub>3</sub></b> | 7 |
| 11dC3  | <b>RMxYPSxRM<br/>F<sub>2</sub>B<sub>3</sub></b> | 6 |
| 11dC4  | <b>RMxYPSxRM<br/>F<sub>2</sub>B<sub>3</sub></b> | 7 |
| 11dC5  | <b>RMxYPSxRM<br/>F<sub>2</sub>B<sub>3</sub></b> | 8 |
| 11fC3  | <b>RMxYPSxRM<br/>F<sub>2</sub>B<sub>3</sub></b> | 7 |
| 12aD8  | <b>RMxYPSxRM<br/>F<sub>2</sub>B<sub>3</sub></b> | 7 |

|        |                                                 |   |
|--------|-------------------------------------------------|---|
| 12aE8  | <b>RMxYPSxRM<br/>F<sub>2</sub>B<sub>3</sub></b> | 7 |
| 12aG7  | <b>RMxYPSxRM<br/>F<sub>2</sub>B<sub>3</sub></b> | 8 |
| 12bB5  | <b>RMxYPSxRM<br/>F<sub>2</sub>B<sub>3</sub></b> | 8 |
| 12bB6  | <b>RMxYPSxRM<br/>F<sub>2</sub>B<sub>3</sub></b> | 7 |
| 12bC5  | <b>RMxYPSxRM<br/>F<sub>2</sub>B<sub>3</sub></b> | 7 |
| 12bG7  | <b>RMxYPSxRM<br/>F<sub>2</sub>B<sub>3</sub></b> | 7 |
| 12cC10 | <b>RMxYPSxRM<br/>F<sub>2</sub>B<sub>3</sub></b> | 7 |
| 12cD10 | <b>RMxYPSxRM<br/>F<sub>2</sub>B<sub>3</sub></b> | 7 |
| 12cD11 | <b>RMxYPSxRM<br/>F<sub>2</sub>B<sub>3</sub></b> | 7 |
| 12eD9  | <b>RMxYPSxRM<br/>F<sub>2</sub>B<sub>3</sub></b> | 7 |
| 12eE9  | <b>RMxYPSxRM<br/>F<sub>2</sub>B<sub>3</sub></b> | 7 |
| 12fF2  | <b>RMxYPSxRM<br/>F<sub>2</sub>B<sub>3</sub></b> | 7 |
| 12fG2  | <b>RMxYPSxRM<br/>F<sub>2</sub>B<sub>3</sub></b> | 7 |
| 13aB12 | <b>RMxYPSxRM<br/>F<sub>2</sub>B<sub>3</sub></b> | 7 |
| 13aC12 | <b>RMxYPSxRM<br/>F<sub>2</sub>B<sub>3</sub></b> | 8 |
| 13aD11 | <b>RMxYPSxRM<br/>F<sub>2</sub>B<sub>3</sub></b> | 7 |
| 13gD11 | <b>RMxYPSxRM<br/>F<sub>2</sub>B<sub>3</sub></b> | 8 |
| 13gD3  | <b>RMxYPSxRM<br/>F<sub>2</sub>B<sub>3</sub></b> | 7 |
| 13gD4  | <b>RMxYPSxRM<br/>F<sub>2</sub>B<sub>3</sub></b> | 8 |
| 13gD5  | <b>RMxYPSxRM<br/>F<sub>2</sub>B<sub>3</sub></b> | 7 |
| 13gE3  | <b>RMxYPSxRM<br/>F<sub>2</sub>B<sub>3</sub></b> | 7 |
| 13gF2  | <b>RMxYPSxRM</b>                                | 8 |

|        | <b>F<sub>2</sub>B<sub>3</sub></b>               |   |
|--------|-------------------------------------------------|---|
| 13gF3  | <b>RMxYPSxRM<br/>F<sub>2</sub>B<sub>3</sub></b> | 7 |
| 13gG2  | <b>RMxYPSxRM<br/>F<sub>2</sub>B<sub>3</sub></b> | 8 |
| 13gG3  | <b>RMxYPSxRM<br/>F<sub>2</sub>B<sub>3</sub></b> | 7 |
| 13gG4  | <b>RMxYPSxRM<br/>F<sub>2</sub>B<sub>3</sub></b> | 7 |
| 14aD2  | <b>RMxYPSxRM<br/>F<sub>2</sub>B<sub>3</sub></b> | 7 |
| 14aD3  | <b>RMxYPSxRM<br/>F<sub>2</sub>B<sub>3</sub></b> | 6 |
| 14aD4  | <b>RMxYPSxRM<br/>F<sub>2</sub>B<sub>3</sub></b> | 7 |
| 14bD2  | <b>RMxYPSxRM<br/>F<sub>2</sub>B<sub>3</sub></b> | 7 |
| 14bE3  | <b>RMxYPSxRM<br/>F<sub>2</sub>B<sub>3</sub></b> | 7 |
| 14cC4  | <b>RMxYPSxRM<br/>F<sub>2</sub>B<sub>3</sub></b> | 7 |
| 14cD2  | <b>RMxYPSxRM<br/>F<sub>2</sub>B<sub>3</sub></b> | 6 |
| 14cD5  | <b>RMxYPSxRM<br/>F<sub>2</sub>B<sub>3</sub></b> | 7 |
| 14cE2  | <b>RMxYPSxRM<br/>F<sub>2</sub>B<sub>3</sub></b> | 7 |
| 14cF1  | <b>RMxYPSxRM<br/>F<sub>2</sub>B<sub>3</sub></b> | 7 |
| 14cF2  | <b>RMxYPSxRM<br/>F<sub>2</sub>B<sub>3</sub></b> | 7 |
| 14eB11 | <b>RMxYPSxRM<br/>F<sub>2</sub>B<sub>3</sub></b> | 7 |
| 14fE10 | <b>RMxYPSxRM<br/>F<sub>2</sub>B<sub>3</sub></b> | 7 |
| 14fF3  | <b>RMxYPSxRM<br/>F<sub>2</sub>B<sub>3</sub></b> | 8 |
| 15aC3  | <b>RMxYPSxRM<br/>F<sub>2</sub>B<sub>3</sub></b> | 7 |
| 15aD1  | <b>RMxYPSxRM<br/>F<sub>2</sub>B<sub>3</sub></b> | 7 |
| 15aD2  | <b>RMxYPSxRM<br/>F<sub>2</sub>B<sub>3</sub></b> | 7 |

|        |                                                  |    |
|--------|--------------------------------------------------|----|
| 15eB2  | <b>RMxYPSxRM<br/>F<sub>2</sub>B<sub>3</sub></b>  | 7  |
| 15eB3  | <b>RMxYPSxRM<br/>F<sub>2</sub>B<sub>3</sub></b>  | 7  |
| 15eB4  | <b>RMxYPSxRM<br/>F<sub>2</sub>B<sub>3</sub></b>  | 6  |
| 15eC3  | <b>RMxYPSxRM<br/>F<sub>2</sub>B<sub>3</sub></b>  | 6  |
| 15eC5  | <b>RMxYPSxRM<br/>F<sub>2</sub>B<sub>3</sub></b>  | 7  |
| 15eD12 | <b>RMxYPSxRM<br/>F<sub>2</sub>B<sub>3</sub></b>  | 6  |
| 15eD5  | <b>RMxYPSxRM<br/>F<sub>2</sub>B<sub>3</sub></b>  | 6  |
| 15eE10 | <b>RMxYPSxRM<br/>F<sub>2</sub>B<sub>3</sub></b>  | 7  |
| 15eE3  | <b>RMxYPSxRM<br/>F<sub>2</sub>B<sub>3</sub></b>  | 6  |
| 15eF2  | <b>RMxYPSxRM<br/>F<sub>2</sub>B<sub>3</sub></b>  | 7  |
| 15eF3  | <b>RMxYPSxRM<br/>F<sub>2</sub>B<sub>3</sub></b>  | 7  |
| 15eF9  | <b>RMxYPSxRM<br/>F<sub>2</sub>B<sub>3</sub></b>  | 6  |
| 16aF3  | <b>RMxYPSxYPS<br/>F<sub>2</sub>B<sub>3</sub></b> | 5  |
| 16bD7  | <b>RMxYPSxYPS<br/>F<sub>2</sub>B<sub>3</sub></b> | <5 |
| 16bE7  | <b>RMxYPSxYPS<br/>F<sub>2</sub>B<sub>3</sub></b> | <5 |
| 16bF8  | <b>RMxYPSxYPS<br/>F<sub>2</sub>B<sub>3</sub></b> | <5 |
| 16bF9  | <b>RMxYPSxYPS<br/>F<sub>2</sub>B<sub>3</sub></b> | <5 |
| 16dB12 | <b>RMxYPSxYPS<br/>F<sub>2</sub>B<sub>3</sub></b> | <5 |
| 16dC11 | <b>RMxYPSxYPS<br/>F<sub>2</sub>B<sub>3</sub></b> | <5 |
| 16eB7  | <b>RMxYPSxYPS<br/>F<sub>2</sub>B<sub>3</sub></b> | 5  |
| 16eD7  | <b>RMxYPSxYPS<br/>F<sub>2</sub>B<sub>3</sub></b> | 5  |
| 16fB5  | <b>RMxYPSxYPS</b>                                | 5  |

|        |                                                  |    |
|--------|--------------------------------------------------|----|
|        | <b>F<sub>2</sub>B<sub>3</sub></b>                |    |
| 16fH6  | <b>RMxYPSxYPS<br/>F<sub>2</sub>B<sub>3</sub></b> | 5  |
| 16gD12 | <b>RMxYPSxYPS<br/>F<sub>2</sub>B<sub>3</sub></b> | 4  |
| 16gE11 | <b>RMxYPSxYPS<br/>F<sub>2</sub>B<sub>3</sub></b> | <4 |
| 17aA4  | <b>RMxYPSxYPS<br/>F<sub>2</sub>B<sub>3</sub></b> | 6  |
| 17aA5  | <b>RMxYPSxYPS<br/>F<sub>2</sub>B<sub>3</sub></b> | 7  |
| 17aB4  | <b>RMxYPSxYPS<br/>F<sub>2</sub>B<sub>3</sub></b> | 4  |
| 17aC11 | <b>RMxYPSxYPS<br/>F<sub>2</sub>B<sub>3</sub></b> | 5  |
| 17aC5  | <b>RMxYPSxYPS<br/>F<sub>2</sub>B<sub>3</sub></b> | 5  |
| 17aC7  | <b>RMxYPSxYPS<br/>F<sub>2</sub>B<sub>3</sub></b> | 5  |
| 17aD3  | <b>RMxYPSxYPS<br/>F<sub>2</sub>B<sub>3</sub></b> | 6  |
| 17aD9  | <b>RMxYPSxYPS<br/>F<sub>2</sub>B<sub>3</sub></b> | 5  |
| 17aE6  | <b>RMxYPSxYPS<br/>F<sub>2</sub>B<sub>3</sub></b> | 5  |
| 17aF4  | <b>RMxYPSxYPS<br/>F<sub>2</sub>B<sub>3</sub></b> | 5  |
| 17bB11 | <b>RMxYPSxYPS<br/>F<sub>2</sub>B<sub>3</sub></b> | 5  |
| 17bD1  | <b>RMxYPSxYPS<br/>F<sub>2</sub>B<sub>3</sub></b> | 5  |
| 17bD2  | <b>RMxYPSxYPS<br/>F<sub>2</sub>B<sub>3</sub></b> | 5  |
| 17cA10 | <b>RMxYPSxYPS<br/>F<sub>2</sub>B<sub>3</sub></b> | 5  |
| 17cB8  | <b>RMxYPSxYPS<br/>F<sub>2</sub>B<sub>3</sub></b> | <4 |
| 18cA4  | <b>RMxYPSxYPS<br/>F<sub>2</sub>B<sub>3</sub></b> | 5  |
| 18cA5  | <b>RMxYPSxYPS<br/>F<sub>2</sub>B<sub>3</sub></b> | 6  |
| 18cB11 | <b>RMxYPSxYPS<br/>F<sub>2</sub>B<sub>3</sub></b> | 6  |

|        |                                                  |    |
|--------|--------------------------------------------------|----|
| 18cB8  | <b>RMxYPSxYPS<br/>F<sub>2</sub>B<sub>3</sub></b> | 6  |
| 18cC8  | <b>RMxYPSxYPS<br/>F<sub>2</sub>B<sub>3</sub></b> | 6  |
| 18cE12 | <b>RMxYPSxYPS<br/>F<sub>2</sub>B<sub>3</sub></b> | 5  |
| 18cF2  | <b>RMxYPSxYPS<br/>F<sub>2</sub>B<sub>3</sub></b> | 6  |
| 18fC12 | <b>RMxYPSxYPS<br/>F<sub>2</sub>B<sub>3</sub></b> | 5  |
| 18fD4  | <b>RMxYPSxYPS<br/>F<sub>2</sub>B<sub>3</sub></b> | 5  |
| 18gB11 | <b>RMxYPSxYPS<br/>F<sub>2</sub>B<sub>3</sub></b> | 5  |
| 18gB4  | <b>RMxYPSxYPS<br/>F<sub>2</sub>B<sub>3</sub></b> | 5  |
| 18gC8  | <b>RMxYPSxYPS<br/>F<sub>2</sub>B<sub>3</sub></b> | 6  |
| 18gD8  | <b>RMxYPSxYPS<br/>F<sub>2</sub>B<sub>3</sub></b> | 5  |
| 18gF2  | <b>RMxYPSxYPS<br/>F<sub>2</sub>B<sub>3</sub></b> | 5  |
| 18gF7  | <b>RMxYPSxYPS<br/>F<sub>2</sub>B<sub>3</sub></b> | 6  |
| 19eB9  | <b>RMxYPSxYPS<br/>F<sub>2</sub>B<sub>3</sub></b> | 6  |
| 19eC10 | <b>RMxYPSxYPS<br/>F<sub>2</sub>B<sub>3</sub></b> | 6  |
| 19eF8  | <b>RMxYPSxYPS<br/>F<sub>2</sub>B<sub>3</sub></b> | 6  |
| 19eF9  | <b>RMxYPSxYPS<br/>F<sub>2</sub>B<sub>3</sub></b> | 6  |
| 19fA1  | <b>RMxYPSxYPS<br/>F<sub>2</sub>B<sub>3</sub></b> | <5 |
| 19fB1  | <b>RMxYPSxYPS<br/>F<sub>2</sub>B<sub>3</sub></b> | 6  |
| 19fC1  | <b>RMxYPSxYPS<br/>F<sub>2</sub>B<sub>3</sub></b> | 5  |
| 19fC4  | <b>RMxYPSxYPS<br/>F<sub>2</sub>B<sub>3</sub></b> | 5  |
| 19fD9  | <b>RMxYPSxYPS<br/>F<sub>2</sub>B<sub>3</sub></b> | 6  |
| 19fG2  | <b>RMxYPSxYPS</b>                                | 5  |

|        | <b>F<sub>2</sub>B<sub>3</sub></b>                |   |
|--------|--------------------------------------------------|---|
| 19fG4  | <b>RMxYPSxYPS<br/>F<sub>2</sub>B<sub>3</sub></b> | 5 |
| 19fG6  | <b>RMxYPSxYPS<br/>F<sub>2</sub>B<sub>3</sub></b> | 5 |
| 19gC11 | <b>RMxYPSxYPS<br/>F<sub>2</sub>B<sub>3</sub></b> | 8 |
| 19gD1  | <b>RMxYPSxYPS<br/>F<sub>2</sub>B<sub>3</sub></b> | 6 |
| 19gE11 | <b>RMxYPSxYPS<br/>F<sub>2</sub>B<sub>3</sub></b> | 5 |
| 20cC2  | <b>RMxYPSxYPS<br/>F<sub>2</sub>B<sub>3</sub></b> | 5 |
| 20cC8  | <b>RMxYPSxYPS<br/>F<sub>2</sub>B<sub>3</sub></b> | 5 |
| 20cD12 | <b>RMxYPSxYPS<br/>F<sub>2</sub>B<sub>3</sub></b> | 5 |
| 20cD7  | <b>RMxYPSxYPS<br/>F<sub>2</sub>B<sub>3</sub></b> | 5 |
| 20cF3  | <b>RMxYPSxYPS<br/>F<sub>2</sub>B<sub>3</sub></b> | 4 |
| 20dB11 | <b>RMxYPSxYPS<br/>F<sub>2</sub>B<sub>3</sub></b> | 6 |
| 20dC11 | <b>RMxYPSxYPS<br/>F<sub>2</sub>B<sub>3</sub></b> | 5 |
| 20dD4  | <b>RMxYPSxYPS<br/>F<sub>2</sub>B<sub>3</sub></b> | 6 |
| 20dF10 | <b>RMxYPSxYPS<br/>F<sub>2</sub>B<sub>3</sub></b> | 5 |
| 20eA5  | <b>RMxYPSxYPS<br/>F<sub>2</sub>B<sub>3</sub></b> | 6 |
| 20eC2  | <b>RMxYPSxYPS<br/>F<sub>2</sub>B<sub>3</sub></b> | 6 |
| 20eD1  | <b>RMxYPSxYPS<br/>F<sub>2</sub>B<sub>3</sub></b> | 5 |
| 20eD2  | <b>RMxYPSxYPS<br/>F<sub>2</sub>B<sub>3</sub></b> | 5 |
| 21aA10 | <b>BYxYPSxBY F<sub>2</sub>B<sub>3</sub></b>      | 6 |
| 21aB5  | <b>BYxYPSxBY F<sub>2</sub>B<sub>3</sub></b>      | 5 |
| 21aC5  | <b>BYxYPSxBY F<sub>2</sub>B<sub>3</sub></b>      | 6 |
| 21aE2  | <b>BYxYPSxBY F<sub>2</sub>B<sub>3</sub></b>      | 6 |
| 21aF7  | <b>BYxYPSxBY F<sub>2</sub>B<sub>3</sub></b>      | 6 |

|        |                                             |   |
|--------|---------------------------------------------|---|
| 21aF8  | <b>BYxYPSxBY F<sub>2</sub>B<sub>3</sub></b> | 6 |
| 21bC11 | <b>BYxYPSxBY F<sub>2</sub>B<sub>3</sub></b> | 6 |
| 21bC3  | <b>BYxYPSxBY F<sub>2</sub>B<sub>3</sub></b> | 6 |
| 21cB10 | <b>BYxYPSxBY F<sub>2</sub>B<sub>3</sub></b> | 5 |
| 21cB5  | <b>BYxYPSxBY F<sub>2</sub>B<sub>3</sub></b> | 6 |
| 21cE2  | <b>BYxYPSxBY F<sub>2</sub>B<sub>3</sub></b> | 5 |
| 21cE8  | <b>BYxYPSxBY F<sub>2</sub>B<sub>3</sub></b> | 6 |
| 21dC5  | <b>BYxYPSxBY F<sub>2</sub>B<sub>3</sub></b> | 6 |
| 21dF3  | <b>BYxYPSxBY F<sub>2</sub>B<sub>3</sub></b> | 6 |
| 22cC2  | <b>BYxYPSxBY F<sub>2</sub>B<sub>3</sub></b> | 8 |
| 22cC3  | <b>BYxYPSxBY F<sub>2</sub>B<sub>3</sub></b> | 8 |
| 22cD3  | <b>BYxYPSxBY F<sub>2</sub>B<sub>3</sub></b> | 8 |
| 22cD4  | <b>BYxYPSxBY F<sub>2</sub>B<sub>3</sub></b> | 8 |
| 22cE3  | <b>BYxYPSxBY F<sub>2</sub>B<sub>3</sub></b> | 7 |
| 22cE4  | <b>BYxYPSxBY F<sub>2</sub>B<sub>3</sub></b> | 7 |
| 22cF4  | <b>BYxYPSxBY F<sub>2</sub>B<sub>3</sub></b> | 7 |
| 22cF5  | <b>BYxYPSxBY F<sub>2</sub>B<sub>3</sub></b> | 7 |
| 22cF8  | <b>BYxYPSxBY F<sub>2</sub>B<sub>3</sub></b> | 7 |
| 22dE12 | <b>BYxYPSxBY F<sub>2</sub>B<sub>3</sub></b> | 8 |
| 22dE3  | <b>BYxYPSxBY F<sub>2</sub>B<sub>3</sub></b> | 7 |
| 22dF5  | <b>BYxYPSxBY F<sub>2</sub>B<sub>3</sub></b> | 8 |
| 22dG4  | <b>BYxYPSxBY F<sub>2</sub>B<sub>3</sub></b> | 7 |
| 23dC11 | <b>BYxYPSxBY F<sub>2</sub>B<sub>3</sub></b> | 7 |
| 23dF3  | <b>BYxYPSxBY F<sub>2</sub>B<sub>3</sub></b> | 7 |
| 23fB2  | <b>BYxYPSxBY F<sub>2</sub>B<sub>3</sub></b> | 7 |
| 23fB3  | <b>BYxYPSxBY F<sub>2</sub>B<sub>3</sub></b> | 7 |
| 23fC11 | <b>BYxYPSxBY F<sub>2</sub>B<sub>3</sub></b> | 7 |
| 23fE1  | <b>BYxYPSxBY F<sub>2</sub>B<sub>3</sub></b> | 7 |
| 23fE7  | <b>BYxYPSxBY F<sub>2</sub>B<sub>3</sub></b> | 7 |
| 23fF7  | <b>BYxYPSxBY F<sub>2</sub>B<sub>3</sub></b> | 7 |
| 23fF8  | <b>BYxYPSxBY F<sub>2</sub>B<sub>3</sub></b> | 6 |
| 23fF9  | <b>BYxYPSxBY F<sub>2</sub>B<sub>3</sub></b> | 7 |
| 23gD11 | <b>BYxYPSxBY F<sub>2</sub>B<sub>3</sub></b> | 7 |
| 23gD9  | <b>BYxYPSxBY F<sub>2</sub>B<sub>3</sub></b> | 7 |
| 23gE8  | <b>BYxYPSxBY F<sub>2</sub>B<sub>3</sub></b> | 6 |
| 23gF10 | <b>BYxYPSxBY F<sub>2</sub>B<sub>3</sub></b> | 7 |
| 23gG3  | <b>BYxYPSxBY F<sub>2</sub>B<sub>3</sub></b> | 7 |



|        |                                                  |   |
|--------|--------------------------------------------------|---|
| 25cA2  | <b>BYxYPSxYPS<br/>F<sub>2</sub>B<sub>3</sub></b> | 6 |
| 25cA5  | <b>BYxYPSxYPS<br/>F<sub>2</sub>B<sub>3</sub></b> | 6 |
| 25cB4  | <b>BYxYPSxYPS<br/>F<sub>2</sub>B<sub>3</sub></b> | 6 |
| 25cC4  | <b>BYxYPSxYPS<br/>F<sub>2</sub>B<sub>3</sub></b> | 6 |
| 25cC8  | <b>BYxYPSxYPS<br/>F<sub>2</sub>B<sub>3</sub></b> | 6 |
| 25cE2  | <b>BYxYPSxYPS<br/>F<sub>2</sub>B<sub>3</sub></b> | 6 |
| 25cF2  | <b>BYxYPSxYPS<br/>F<sub>2</sub>B<sub>3</sub></b> | 6 |
| 25eA10 | <b>BYxYPSxYPS<br/>F<sub>2</sub>B<sub>3</sub></b> | 6 |
| 25eA11 | <b>BYxYPSxYPS<br/>F<sub>2</sub>B<sub>3</sub></b> | 6 |
| 25eA12 | <b>BYxYPSxYPS<br/>F<sub>2</sub>B<sub>3</sub></b> | 6 |
| 25eB10 | <b>BYxYPSxYPS<br/>F<sub>2</sub>B<sub>3</sub></b> | 6 |
| 25eB9  | <b>BYxYPSxYPS<br/>F<sub>2</sub>B<sub>3</sub></b> | 6 |
| 25eD10 | <b>BYxYPSxYPS<br/>F<sub>2</sub>B<sub>3</sub></b> | 6 |
| 25eE2  | <b>BYxYPSxYPS<br/>F<sub>2</sub>B<sub>3</sub></b> | 6 |
| 25eF2  | <b>BYxYPSxYPS<br/>F<sub>2</sub>B<sub>3</sub></b> | 6 |
| 26aC10 | <b>BYxYPSxYPS<br/>F<sub>2</sub>B<sub>3</sub></b> | 6 |
| 26aE1  | <b>BYxYPSxYPS<br/>F<sub>2</sub>B<sub>3</sub></b> | 6 |
| 26aF7  | <b>BYxYPSxYPS<br/>F<sub>2</sub>B<sub>3</sub></b> | 6 |
| 26bC9  | <b>BYxYPSxYPS<br/>F<sub>2</sub>B<sub>3</sub></b> | 5 |
| 26bD11 | <b>BYxYPSxYPS<br/>F<sub>2</sub>B<sub>3</sub></b> | 6 |
| 26eA1  | <b>BYxYPSxYPS<br/>F<sub>2</sub>B<sub>3</sub></b> | 6 |
| 26eC7  | <b>BYxYPSxYPS</b>                                | 7 |

|        | <b>F<sub>2</sub>B<sub>3</sub></b>                |   |
|--------|--------------------------------------------------|---|
| 26eE10 | <b>BYxYPSxYPS<br/>F<sub>2</sub>B<sub>3</sub></b> | 7 |
| 26eG11 | <b>BYxYPSxYPS<br/>F<sub>2</sub>B<sub>3</sub></b> | 7 |
| 26gA7  | <b>BYxYPSxYPS<br/>F<sub>2</sub>B<sub>3</sub></b> | 8 |
| 26gB2  | <b>BYxYPSxYPS<br/>F<sub>2</sub>B<sub>3</sub></b> | 6 |
| 26gD10 | <b>BYxYPSxYPS<br/>F<sub>2</sub>B<sub>3</sub></b> | 6 |
| 26gD7  | <b>BYxYPSxYPS<br/>F<sub>2</sub>B<sub>3</sub></b> | 6 |
| 26gG11 | <b>BYxYPSxYPS<br/>F<sub>2</sub>B<sub>3</sub></b> | 6 |
| 28aC2  | <b>BYxYPSxYPS<br/>F<sub>2</sub>B<sub>3</sub></b> | 6 |
| 28bB4  | <b>BYxYPSxYPS<br/>F<sub>2</sub>B<sub>3</sub></b> | 6 |
| 28bC5  | <b>BYxYPSxYPS<br/>F<sub>2</sub>B<sub>3</sub></b> | 6 |
| 28bH6  | <b>BYxYPSxYPS<br/>F<sub>2</sub>B<sub>3</sub></b> | 6 |
| 28cD5  | <b>BYxYPSxYPS<br/>F<sub>2</sub>B<sub>3</sub></b> | 7 |
| 28cD7  | <b>BYxYPSxYPS<br/>F<sub>2</sub>B<sub>3</sub></b> | 6 |
| 28cE1  | <b>BYxYPSxYPS<br/>F<sub>2</sub>B<sub>3</sub></b> | 6 |
| 28cH8  | <b>BYxYPSxYPS<br/>F<sub>2</sub>B<sub>3</sub></b> | 6 |
| 28dA4  | <b>BYxYPSxYPS<br/>F<sub>2</sub>B<sub>3</sub></b> | 6 |
| 28dC9  | <b>BYxYPSxYPS<br/>F<sub>2</sub>B<sub>3</sub></b> | 6 |
| 28dD7  | <b>BYxYPSxYPS<br/>F<sub>2</sub>B<sub>3</sub></b> | 6 |
| 28fB2  | <b>BYxYPSxYPS<br/>F<sub>2</sub>B<sub>3</sub></b> | 6 |
| 28fB6  | <b>BYxYPSxYPS<br/>F<sub>2</sub>B<sub>3</sub></b> | 6 |
| 28fC2  | <b>BYxYPSxYPS<br/>F<sub>2</sub>B<sub>3</sub></b> | 6 |

|        |                                                  |   |
|--------|--------------------------------------------------|---|
| 28fD9  | <b>BYxYPSxYPS<br/>F<sub>2</sub>B<sub>3</sub></b> | 6 |
| 29eB3  | <b>BYxYPSxYPS<br/>F<sub>2</sub>B<sub>3</sub></b> | 6 |
| 29eC6  | <b>BYxYPSxYPS<br/>F<sub>2</sub>B<sub>3</sub></b> | 7 |
| 29eD2  | <b>BYxYPSxYPS<br/>F<sub>2</sub>B<sub>3</sub></b> | 5 |
| 29eD4  | <b>BYxYPSxYPS<br/>F<sub>2</sub>B<sub>3</sub></b> | 6 |
| 29eE7  | <b>BYxYPSxYPS<br/>F<sub>2</sub>B<sub>3</sub></b> | 6 |
| 29fA3  | <b>BYxYPSxYPS<br/>F<sub>2</sub>B<sub>3</sub></b> | 6 |
| 29fB3  | <b>BYxYPSxYPS<br/>F<sub>2</sub>B<sub>3</sub></b> | 6 |
| 29fD12 | <b>BYxYPSxYPS<br/>F<sub>2</sub>B<sub>3</sub></b> | 6 |
| 29fG12 | <b>BYxYPSxYPS<br/>F<sub>2</sub>B<sub>3</sub></b> | 6 |
| 29gB3  | <b>BYxYPSxYPS<br/>F<sub>2</sub>B<sub>3</sub></b> | 6 |
| 29gC1  | <b>BYxYPSxYPS<br/>F<sub>2</sub>B<sub>3</sub></b> | 7 |
| 29gD2  | <b>BYxYPSxYPS<br/>F<sub>2</sub>B<sub>3</sub></b> | 4 |
| 29gD9  | <b>BYxYPSxYPS<br/>F<sub>2</sub>B<sub>3</sub></b> | 6 |
| 29gF7  | <b>BYxYPSxYPS<br/>F<sub>2</sub>B<sub>3</sub></b> | 5 |
| 29gG7  | <b>BYxYPSxYPS<br/>F<sub>2</sub>B<sub>3</sub></b> | 6 |
| 30aD4  | <b>BYxYPSxYPS<br/>F<sub>2</sub>B<sub>3</sub></b> | 6 |
| 30bB12 | <b>BYxYPSxYPS<br/>F<sub>2</sub>B<sub>3</sub></b> | 6 |
| 30bB4  | <b>BYxYPSxYPS<br/>F<sub>2</sub>B<sub>3</sub></b> | 6 |
| 30cB4  | <b>BYxYPSxYPS<br/>F<sub>2</sub>B<sub>3</sub></b> | 6 |
| 30cD8  | <b>BYxYPSxYPS<br/>F<sub>2</sub>B<sub>3</sub></b> | 6 |
| 30eB2  | <b>BYxYPSxYPS</b>                                | 5 |

|        | <b>F<sub>2</sub>B<sub>3</sub></b>                |   |
|--------|--------------------------------------------------|---|
| 30eC12 | <b>BYxYPSxYPS<br/>F<sub>2</sub>B<sub>3</sub></b> | 5 |
| 30eE4  | <b>BYxYPSxYPS<br/>F<sub>2</sub>B<sub>3</sub></b> | 6 |
| 30eE9  | <b>BYxYPSxYPS<br/>F<sub>2</sub>B<sub>3</sub></b> | 5 |
| 30fE2  | <b>BYxYPSxYPS<br/>F<sub>2</sub>B<sub>3</sub></b> | 5 |
| 30fE4  | <b>BYxYPSxYPS<br/>F<sub>2</sub>B<sub>3</sub></b> | 5 |
| 30gC1  | <b>BYxYPSxYPS<br/>F<sub>2</sub>B<sub>3</sub></b> | 5 |
| 30gF1  | <b>BYxYPSxYPS<br/>F<sub>2</sub>B<sub>3</sub></b> | 5 |

**Table S2.** All putative QTL and associated genes.

| Cross  | Family | Backcross_Parent | Chromosome | Pos_Start | Pos_End | Q-value     | Gene(s)                                                                                                                                                                                                            |
|--------|--------|------------------|------------|-----------|---------|-------------|--------------------------------------------------------------------------------------------------------------------------------------------------------------------------------------------------------------------|
| BYxRM  | 5      | BY               | 1          | 203222    | 229104  | 0.491374926 | YAR053W, IMD1, FLO1, YAR060C, YAR069C, YAR068W, YAR075W, YAR066W, YAR070C, PHO11, YAR064W                                                                                                                          |
| BYxYPS | 21     | BY               | 1          | 195677    | 206489  | 0.010700326 | FLO1, SWH1, YAR047C                                                                                                                                                                                                |
| RMxYPS | 15     | RM               | 2          | 711791    | 713780  | 0.063778622 | ENP1, RRT2                                                                                                                                                                                                         |
| RMxYPS | 18     | YPS              | 2          | 741096    | 801523  | 0.018056481 | MAL33, CHK1, SAF1, VBA2, YBR284W, BIT2, MRPL37, SUL1, YBR287W, SDH8, UBX7, BSD2, SSH1, RIF1, DPB3, EFM2, SNF5, PCA1, APE3, MRPL27, PPS1, PHO89, CTP1, PAF1, APM3, YBR292C, YBR296C-A, HSM3, DUG2, YBR285W, YBR277C |
| RMxYPS | 19     | YPS              | 2          | 751853    | 799717  | 0.007614068 | SAF1, VBA2, YBR284W, SUL1, YBR287W, BSD2, SSH1, RIF1, DPB3, SNF5, PCA1, APE3, MRPL27, PPS1, PHO89, CTP1, PAF1, APM3, YBR292C, DUG2, YBR285W, YBR277C                                                               |
| BYxYPS | 22     | BY               | 2          | 183084    | 204924  | 0.125418612 | YBL012C, FUS3, POP8, FMT1, PEP1, ACH1, APN2, RRN6, RFT1, SCT1                                                                                                                                                      |
| BYxYPS | 26     | YPS              | 2          | 489432    | 496917  | 0.055277584 | ATG14, TPS1, OPY1, SHE3, VMA2, YBR126W-B, YBR126W-A                                                                                                                                                                |
| BYxYPS | 26     | YPS              | 2          | 683414    | 699559  | 0.155461499 | YBR232C, ABD1, YBR238C, PBP2, ERT1, PRP5, DAD3, ARC40, VHC1                                                                                                                                                        |
| BYxRM  | 3      | BY               | 3          | 46486     | 51491   | 0.253092233 | MGR1, YCL046W, GLK1, EMC1, YCL042W, YCL041C, PDI1                                                                                                                                                                  |
| BYxRM  | 10     | RM               | 3          | 105047    | 145017  | 0.002878526 | ADY2, CIT2, ADP1, LDB16, MRPL32, STP22, PGK1, YCR013C, CDC10, YCL007C, YCL001W-B, YCL001W-A, RVS161, POL4, YCR001W, YCL002C, PGS1, YCR015C, ILV6, SAT4, YCR007C, RER1, YCR016W, YCP4, YCR006C, VMA9, CWH43         |
| BYxRM  | 2      | BY               | 3          | 157998    | 201190  | 0.003769973 | TAF2, RRP43, BPH1, RBK1, MATALPHA1, RIM1, YCR023C, SNT1, ELO2, RPS14A, YCR025C, BUD5, SLM5, YCR041W, MATALPHA2, YCR038W-A, PHO87, RHB1, FEN2, SYP1, NPP1, PMP1, YCR024C-B                                          |
| BYxRM  | 1      | BY               | 3          | 167725    | 201259  | 0.008827553 | TAF2, RRP43, BPH1, RBK1, MATALPHA1, RIM1, SNT1, ELO2, RPS14A, BUD5, YCR041W, MATALPHA2, YCR038W-A, PHO87, RHB1, FEN2, SYP1                                                                                         |
| BYxRM  | 4      | BY               | 3          | 167725    | 204898  | 0.001477316 | TAF2, RRP43, BPH1, RBK1, MATALPHA1, RIM1, SNT1, ELO2, RPS14A, BUD5, YCR041W, MATALPHA2, YCR038W-A, PHO87, RHB1, FEN2, SYP1                                                                                         |
| BYxRM  | 3      | BY               | 3          | 188419    | 204751  | 0.007469736 | TAF2, RRP43, RBK1, MATALPHA1, SNT1, ELO2, BUD5, YCR041W, MATALPHA2, YCR038W-A, PHO87                                                                                                                               |
| BYxRM  | 5      | BY               | 3          | 193829    | 201190  | 0.049211775 | TAF2, RBK1, MATALPHA1, BUD5, YCR041W, MATALPHA2, YCR038W-                                                                                                                                                          |

|        |    |     |   |        |        |             |                                                                                                                                                                                                                                                                                                                                                                                                                                                                                                                                                                                                                                                                                                                        |
|--------|----|-----|---|--------|--------|-------------|------------------------------------------------------------------------------------------------------------------------------------------------------------------------------------------------------------------------------------------------------------------------------------------------------------------------------------------------------------------------------------------------------------------------------------------------------------------------------------------------------------------------------------------------------------------------------------------------------------------------------------------------------------------------------------------------------------------------|
|        |    |     |   |        |        |             | A, PHO87                                                                                                                                                                                                                                                                                                                                                                                                                                                                                                                                                                                                                                                                                                               |
| RMxYPS | 20 | YPS | 3 | 57843  | 95149  | 0.081297613 | LEU2, FRM2, HBN1, AGP1, YCL019W, GFD2, KCC4, RRP7, YCL023C, DCC1, MXR2, YCL022C, HIS4, NFS1, GRX1, YCL021W-A, BIK1, YCL020W, STE50, RNQ1, FUS1, SRO9, LSB5                                                                                                                                                                                                                                                                                                                                                                                                                                                                                                                                                             |
| RMxYPS | 12 | RM  | 3 | 81816  | 233246 | 0.000807773 | LEU2, ADY2, HSP30, CIT2, TAF2, RRP43, SRD1, BPH1, YCR018C-A, SGF29, PWP2, YCR045W-A, YCL019W, ADP1, RBK1, LDB16, PET18, YCR061W, RRT12, GBP2, RSC6, KCC4, YCR051W, YCR064C, RAD18, MRPL32, STP22, MATALPHA1, RIM1, YCR023C, ARE1, SNT1, PGK1, HTL1, DCC1, YIH1, YCR013C, BUD31, YCR022C, ELO2, SED4, CDC10, YCR050C, YCL022C, NFS1, YCR043C, YCL007C, THR4, YCL001W-B, YCL001W-A, RVS161, RPS14A, POL4, YCR001W, YCR025C, YCL021W-A, CTR86, IMG1, BUD3, YCL002C, PGS1, BUD5, YCL020W, YCR015C, ILV6, YCR049C, SLM5, SAT4, HCM1, YCR007C, YCR041W, MATALPHA2, RER1, YCR038W-A, YCR047W-A, YCR016W, PHO87, RHB1, TAH1, YCL012C, MAK32, FEN2, PER1, YCP4, YCR006C, VMA9, SYP1, CWH43, NPP1, BUD23, MAK31, PMP1, YCR024C-B |
| RMxYPS | 14 | RM  | 3 | 93902  | 209649 | 0.000775724 | ADY2, HSP30, CIT2, TAF2, RRP43, SRD1, BPH1, YCR018C-A, SGF29, YCR045W-A, ADP1, RBK1, LDB16, PET18, RRT12, GBP2, MRPL32, STP22, MATALPHA1, RIM1, YCR023C, SNT1, PGK1, HTL1, DCC1, YCR013C, YCR022C, ELO2, CDC10, NFS1, YCR043C, YCL007C, YCL001W-B, YCL001W-A, RVS161, RPS14A, POL4, YCR001W, YCR025C, BUD3, YCL002C, PGS1, BUD5, YCR015C, ILV6, SLM5, SAT4, YCR007C, YCR041W, MATALPHA2, RER1, YCR038W-A, YCR016W, PHO87, RHB1, YCL012C, MAK32, FEN2, PER1, YCP4, YCR006C, VMA9, SYP1, CWH43, NPP1, MAK31, PMP1, YCR024C-B                                                                                                                                                                                             |
| RMxYPS | 11 | RM  | 3 | 152950 | 201983 | 0.001049241 | HSP30, TAF2, RRP43, BPH1, RBK1, PET18, MATALPHA1, RIM1, YCR023C, SNT1, HTL1, YCR022C, ELO2, RPS14A, YCR025C, BUD5, SLM5, YCR041W, MATALPHA2, YCR038W-A, PHO87, RHB1, MAK32, FEN2, SYP1, NPP1, MAK31, PMP1, YCR024C-B                                                                                                                                                                                                                                                                                                                                                                                                                                                                                                   |
| RMxYPS | 13 | RM  | 3 | 165408 | 206234 | 0.003780424 | TAF2, RRP43, BPH1, RBK1, MATALPHA1, RIM1, SNT1, ELO2, RPS14A, BUD5, YCR041W, MATALPHA2, YCR038W-A, PHO87, RHB1, FEN2, SYP1, NPP1                                                                                                                                                                                                                                                                                                                                                                                                                                                                                                                                                                                       |
| RMxYPS | 15 | RM  | 3 | 201027 | 207706 | 0.001132588 | TAF2, YCR043C, YCR041W, PER1                                                                                                                                                                                                                                                                                                                                                                                                                                                                                                                                                                                                                                                                                           |
| RMxYPS | 16 | YPS | 3 | 208955 | 209911 | 0.178486112 | YCR045W-A, RRT12                                                                                                                                                                                                                                                                                                                                                                                                                                                                                                                                                                                                                                                                                                       |

|        |    |     |   |         |         |             |                                                                                                                                                                                                                                                                                                                                                                                                                                                                                                                                                            |
|--------|----|-----|---|---------|---------|-------------|------------------------------------------------------------------------------------------------------------------------------------------------------------------------------------------------------------------------------------------------------------------------------------------------------------------------------------------------------------------------------------------------------------------------------------------------------------------------------------------------------------------------------------------------------------|
|        |    |     |   |         |         |             | LEU2, ADY2, HSP30, CIT2, TAF2, RRP43, SRD1, AGP1, BPH1, YCR018C-A, SGF29, YCL019W, ADP1, RBK1, LDB16, PET18, GBP2, KCC4, MRPL32, STP22, MATALPHA1, RIM1, YCR023C, YCL023C, SNT1, PGK1, HTL1, DCC1, YCR013C, YCR022C, ELO2, CDC10, YCL022C, NFS1, YCL007C, YCL001W-B, YCL001W-A, RVS161, RPS14A, POL4, YCR001W, YCR025C, YCL021W-A, BUD3, YCL002C, PGS1, BUD5, YCL020W, YCR015C, ILV6, SLM5, SAT4, YCR007C, YCR041W, MATALPHA2, RER1, YCR038W-A, YCR016W, PHO87, RHB1, YCL012C, MAK32, FEN2, YCP4, YCR006C, VMA9, SYP1, CWH43, NPP1, MAK31, PMP1, YCR024C-B |
| BYxYPS | 21 | BY  | 3 | 77849   | 201190  | 0.00096418  |                                                                                                                                                                                                                                                                                                                                                                                                                                                                                                                                                            |
| BYxYPS | 22 | BY  | 3 | 95658   | 205887  | 0.001740149 | ADY2, HSP30, CIT2, TAF2, RRP43, SRD1, BPH1, YCR018C-A, SGF29, ADP1, RBK1, LDB16, PET18, GBP2, MRPL32, STP22, MATALPHA1, RIM1, YCR023C, SNT1, PGK1, HTL1, DCC1, YCR013C, YCR022C, ELO2, CDC10, YCL007C, YCL001W-B, YCL001W-A, RVS161, RPS14A, POL4, YCR001W, YCR025C, BUD3, YCL002C, PGS1, BUD5, YCR015C, ILV6, SLM5, SAT4, YCR007C, YCR041W, MATALPHA2, RER1, YCR038W-A, YCR016W, PHO87, RHB1, YCL012C, MAK32, FEN2, YCP4, YCR006C, VMA9, SYP1, CWH43, NPP1, MAK31, PMP1, YCR024C-B                                                                        |
| BYxYPS | 25 | BY  | 3 | 187854  | 211349  | 0.002028799 | TAF2, RRP43, YCR045W-A, RBK1, RRT12, MATALPHA1, SNT1, ELO2, YCR043C, IMG1, BUD5, YCR041W, MATALPHA2, YCR038W-A, YCR047W-A, PHO87, PER1, BUD23                                                                                                                                                                                                                                                                                                                                                                                                              |
| BYxYPS | 23 | BY  | 3 | 197218  | 201628  | 0.003984867 | TAF2, MATALPHA1, BUD5, YCR041W, MATALPHA2, YCR038W-A                                                                                                                                                                                                                                                                                                                                                                                                                                                                                                       |
| BYxYPS | 28 | YPS | 3 | 252270  | 303525  | 0.008591062 | HMRA2, HMRA1, KIN82, TUP1, YCR081C-A, CDC39, TRX3, YCR099C, GIT1, MSH3, ABP1, YCR101C, SRB8, YCR085W, YCR095W-A, PTC6, CDC50, CSM1, YCR097W-A, YCR087W, OCA4, PAT1, YCR100C, FIG2, AHC2, YCR087C-A, YCR090C                                                                                                                                                                                                                                                                                                                                                |
| BYxRM  | 2  | BY  | 4 | 1394088 | 1417873 | 0.107647236 | YDR476C, TRS31, SDC1, SNF1, YDR467C, DIG2, PRP3, PKH3, UGO1, TLG1, JIP4, RPL27B, RMT2, PEX29, SNM1                                                                                                                                                                                                                                                                                                                                                                                                                                                         |
| RMxYPS | 20 | YPS | 4 | 625474  | 714612  | 0.022125027 | YDR114C, YDR102C, BMH2, TRM1, YDR090C, YDR094W, FOB1, YDR124W, INO2, TRS85, YDR109C, TMA64, TMN2, DPB4, COX26, ARP10, MTC5, SPO71, RLI1, ECM18, PDS1, STE5, MRPL1, TVP15, UBC13, SAC6, GIS1, ALT2, KIN1, IRC2, SWF1, VBA4, TMS1, YDR118W-A, DNF2, YDR115W, GRX3, ARX1,                                                                                                                                                                                                                                                                                     |

|        |    |     |   |        |        |             |                                                                                                                                                                                                                                                                                                                                                                                                                                                                                                                                                                                                                                                                                                                                                                                                                                                                                                                                                                                                                      |
|--------|----|-----|---|--------|--------|-------------|----------------------------------------------------------------------------------------------------------------------------------------------------------------------------------------------------------------------------------------------------------------------------------------------------------------------------------------------------------------------------------------------------------------------------------------------------------------------------------------------------------------------------------------------------------------------------------------------------------------------------------------------------------------------------------------------------------------------------------------------------------------------------------------------------------------------------------------------------------------------------------------------------------------------------------------------------------------------------------------------------------------------|
|        |    |     |   |        |        |             | ARO1, YDR095C, APC4, YDR098C-B, YDR098C-A, MSH6                                                                                                                                                                                                                                                                                                                                                                                                                                                                                                                                                                                                                                                                                                                                                                                                                                                                                                                                                                      |
| BYxYPS | 28 | YPS | 4 | 115568 | 130869 | 0.031997294 | RPL41A, YDL185C-A, RPL35A, PPH22, ARF1, VMA1, RBS1, YDL186W, UFD2, YDL187C, NUS1                                                                                                                                                                                                                                                                                                                                                                                                                                                                                                                                                                                                                                                                                                                                                                                                                                                                                                                                     |
| BYxYPS | 22 | BY  | 4 | 637466 | 751285 | 0.125418612 | YDR114C, YDR102C, BMH2, DOP1, TRM1, FOB1, VPS61, TAF12, YDR124W, INO2, TRS85, YDR109C, TMA64, TMN2, PEX7, DPB4, YCF1, COX26, ARP10, MTC5, SPO71, ECM18, MTQ2, PDS1, STE5, SWI5, YDR131C, MRPL1, TVP15, SAC6, GIS1, ALT2, KIN1, IRC2, SWF1, SAN1, YDR134C, RUB1, VBA4, TMS1, YDR118W-A, FIN1, YDR132C, YDR115W, GRX3, ARX1, RGP1, MKC7, ARO1, APC4, YDR098C-B, YDR098C-A, MSH6, YDR133C, HPR1                                                                                                                                                                                                                                                                                                                                                                                                                                                                                                                                                                                                                         |
| BYxRM  | 2  | BY  | 5 | 190283 | 206003 | 0.107647236 | SRB4, YER023C-A, GPA2, ISC1, PRO3, GCD11, RPN3, SPC25, YAT2, SBH2, AFG3                                                                                                                                                                                                                                                                                                                                                                                                                                                                                                                                                                                                                                                                                                                                                                                                                                                                                                                                              |
| BYxYPS | 22 | BY  | 5 | 28649  | 29909  | 0.125418612 | AVT2, SIT1                                                                                                                                                                                                                                                                                                                                                                                                                                                                                                                                                                                                                                                                                                                                                                                                                                                                                                                                                                                                           |
| BYxYPS | 29 | YPS | 5 | 116577 | 334274 | 0.087365008 | ZRG8, EAF5, PIC2, THO1, HEM14, SAH1, URA3, SRB4, NOP16, UTP7, GIM4, MEI4, YER006C-A, YEL020C, VAB2, MXR1, ICP55, GIP2, MMS21, CHZ1, MNN1, GPP2, KRE29, YEL020C-B, YEL010W, SER3, WBP1, RNR1, YER023C-A, YER039C-A, JHD1, FMP52, MIG3, ACA1, YER079C-A, GPA2, UBC8, YEL008C-A, ARG5,6, PRE1, YER077C, YEL008W, RPS24A, EDC3, CEM1, ISC1, PCL6, YER087C-A, YER084W, IRC22, ERG28, PRO3, HOM3, ILV1, FCY21, VAC8, YER068C-A, PMI40, GCD11, PRP22, FIR1, RPL34A, YER078W-A, YER076W-A, PET117, VTC1, PHM8, HMF1, MOT2, YER053C-A, NUG1, DOT6, CHO1, SAP1, YER010C, PMP2, GTT3, YER084W-A, TMA20, MIT1, RGI1, YEL018C-A, SMB1, YND1, YER067C-A, RPN3, ISD11, GCN4, SPO73, ALD5, TIR1, YER034W, YER079W, YER085C, YEA6, YER046W-A, RSM18, RRT13, YEL014C, SPC25, HIS1, YPT31, BIM1, GET2, YEA4, YEL009C-A, HVG1, YAT2, YEN1, TDA2, NTF2, EDC2, GLC3, AIM9, PTP3, SBH2, TPA1, SEC3, FAA2, YER066C-A, FCY2, AIM10, PAC2, GAL83, AFG3, ARB1, YER038W-A, GLN3, CAJ1, YER076C, SBH1, FCY22, BUD25, VHR2, YOS1, TIM9, ICL1, NPP2 |
| BYxYPS | 30 | YPS | 5 | 117889 | 193525 | 0.001861178 | EAF5, HEM14, NOP16, GIM4, YER006C-A, YEL020C, VAB2, MMS21, MNN1, YEL010W, WBP1, FMP52, UBC8, YEL008C-A, PRE1, YEL008W, EDC3, ISC1, IRC22, VAC8, PMI40, PRP22, NUG1, YER010C, PMP2, GTT3, TMA20, MIT1, YEL018C-A, YND1, GCN4, TIR1, YEA6, YEL014C, SPC25, BIM1, YEA4,                                                                                                                                                                                                                                                                                                                                                                                                                                                                                                                                                                                                                                                                                                                                                 |



|        |    |     |   |        |        |             |                                                                                                                                                                                                                                                                                                                                                                                                                                                                                                                                                                                                                                                                                                                                                                                                                                                                                                                                                                                                                                                                                                                                                                                                                                                                                                                                                                              |
|--------|----|-----|---|--------|--------|-------------|------------------------------------------------------------------------------------------------------------------------------------------------------------------------------------------------------------------------------------------------------------------------------------------------------------------------------------------------------------------------------------------------------------------------------------------------------------------------------------------------------------------------------------------------------------------------------------------------------------------------------------------------------------------------------------------------------------------------------------------------------------------------------------------------------------------------------------------------------------------------------------------------------------------------------------------------------------------------------------------------------------------------------------------------------------------------------------------------------------------------------------------------------------------------------------------------------------------------------------------------------------------------------------------------------------------------------------------------------------------------------|
|        |    |     |   |        |        |             | YEL009C-A, NTF2, GLC3, SEC3, FAA2, PAC2, AFG3, BUD25, NPP2                                                                                                                                                                                                                                                                                                                                                                                                                                                                                                                                                                                                                                                                                                                                                                                                                                                                                                                                                                                                                                                                                                                                                                                                                                                                                                                   |
| BYxYPS | 21 | BY  | 5 | 379332 | 402268 | 0.033741162 | KAP123, SPR6, TMN3, SWI4, YER119C-A, AVT6, BOI2, SHO1, RPL23B, SCS2, SLX8, LSM4                                                                                                                                                                                                                                                                                                                                                                                                                                                                                                                                                                                                                                                                                                                                                                                                                                                                                                                                                                                                                                                                                                                                                                                                                                                                                              |
| BYxYPS | 23 | BY  | 5 | 547317 | 564921 | 0.245655034 | YER186C, PDA1, FAU1, ISC10, FMP10, YER181C, SLO1, TOG1, DMC1, PUG1                                                                                                                                                                                                                                                                                                                                                                                                                                                                                                                                                                                                                                                                                                                                                                                                                                                                                                                                                                                                                                                                                                                                                                                                                                                                                                           |
| RMxYPS | 16 | YPS | 6 | 30312  | 74155  | 0.063848262 | OTU1, RPL22B, MOB2, SEC53, YFL051C, TUB2, FMP32, RPO41, RGD2, ACT1, YFL040W, EMP47, YPT1, FET5, SWP82, ALR2, YFL042C, YFL034W, YFL041W-A, RIM15                                                                                                                                                                                                                                                                                                                                                                                                                                                                                                                                                                                                                                                                                                                                                                                                                                                                                                                                                                                                                                                                                                                                                                                                                              |
| RMxYPS | 19 | YPS | 6 | 43492  | 58329  | 0.028072187 | OTU1, SEC53, TUB2, ACT1, YFL040W, YPT1, FET5, YFL042C, YFL041W-A                                                                                                                                                                                                                                                                                                                                                                                                                                                                                                                                                                                                                                                                                                                                                                                                                                                                                                                                                                                                                                                                                                                                                                                                                                                                                                             |
| RMxYPS | 15 | RM  | 7 | 190640 | 197152 | 0.020837377 | YGL165C, YRB30, RAD54, CUP2                                                                                                                                                                                                                                                                                                                                                                                                                                                                                                                                                                                                                                                                                                                                                                                                                                                                                                                                                                                                                                                                                                                                                                                                                                                                                                                                                  |
| RMxYPS | 16 | YPS | 7 | 363327 | 678868 | 0.038924507 | TAM41, ALG13, GEP7, PNC1, SEC9, MSB2, TYW3, PRP18, YGR079W, TRP5, RSC1, CAX4, VMA7, MPO1, ALG2, PMC1, TPC1, MRP13, YGR066C, YGR054W, ALK1, PMA1, TFC4, YGR042W, PEX8, CUL3, DST1, RRP46, UGA1, YGR051C, YGL063C-A, PYC1, NMA2, SLX9, GSC2, STT3, PUF4, RPL7A, DBF2, RNA15, SPT4, LST7, MST27, PAC10, YGR017W, ECT1, PDR1, MUP1, CDH1, RAD6, YGL074C, YGR039W, YGR025W, IMO32, ERG25, PRP31, RPL24A, RPL11B, BUD9, SDS23, HEM2, YGR067C, YGL036W, YGR073C, YGR018C, YGR038C-A, YGR038C-B, SNU71, YGR050C, PUS2, TOM20, CWH41, YGR021W, YGR035C, RPB9, ATE1, AGA2, UPF3, BRP1, SPR3, RIM8, YGR064W, MIG1, MRPL25, MNP1, LEU1, YGL052W, AFT1, NQM1, ERG4, SCW11, RPN14, NPY1, HNM1, YGR045C, ORM1, YGR026W, PIL1, YGR027W-A, YGR027W-B, VAS1, PIB2, PRP38, PDC6, OLE1, RME1, YGL041C, ART5, YGL039W, YGL006W-A, CKB1, PEX31, RPT6, YGR016W, YGL024W, RPL26B, CTT1, HSF1, KAP122, YGL007C-A, YGR022C, RPL30, UTP22, ADE6, YGR035W-A, YGL069C, YGR015C, EFM5, PKP2, KSS1, ERG26, YGR012W, YGR053C, STF2, YGL014C-A, YBP2, PEF1, YGL041W-A, ASK10, VHT1, GET1, POP6, PRM8, ENV11, SGF73, NAG1, YGL034C, JAC1, SCM4, TFG2, TIF4632, YGR011W, CGR1, SCL1, COG7, MPS2, ACB1, RPS25A, MRH4, HOP2, DRN1, COX18, TWF1, YGR068W-A, SMD1, MSP1, ROM1, ERV14, YGL041C-B, SWC4, YGL042C, OCH1, GCD2, YGR069W, ERP6, FMP48, UFD1, THG1, DUO1, ERV1, PGD1, NNF2, MTL1, YGL015C, TIM21, YGL072C |
| RMxYPS | 16 | YPS | 7 | 761881 | 768254 | 0.178486112 | LSB1, YGR137W, TPO2, CBF2, YGR139W, PRE9                                                                                                                                                                                                                                                                                                                                                                                                                                                                                                                                                                                                                                                                                                                                                                                                                                                                                                                                                                                                                                                                                                                                                                                                                                                                                                                                     |

|        |    |     |   |        |        |             |                                                                                                                                                                                                                                                                                                                                                                            |
|--------|----|-----|---|--------|--------|-------------|----------------------------------------------------------------------------------------------------------------------------------------------------------------------------------------------------------------------------------------------------------------------------------------------------------------------------------------------------------------------------|
| BYxYPS | 29 | YPS | 7 | 42652  | 52589  | 0.035015252 | YGL239C, KAP114, YGL242C, CSE1, TAD1, RTF1, DOC1                                                                                                                                                                                                                                                                                                                           |
| BYxYPS | 26 | YPS | 7 | 627366 | 667124 | 0.113087961 | YGR079W, MRP13, PEX8, SLX9, PAC10, PRP31, RPL11B, YGR073C, TOM20, UPF3, MRPL25, PIL1, PRP38, PDC6, CTT1, UTP22, ENV11, TWF1, SMD1, ROM1, GCD2, YGR069W, NNF2                                                                                                                                                                                                               |
| BYxYPS | 30 | YPS | 7 | 645458 | 739655 | 0.000322546 | MEP1, TPC1, SPT6, MRP13, TEL2, RRP46, DAM1, SRB5, DBF2, NOP7, PRP31, YGR117C, RPL11B, CLD1, ESP1, VOA1, CLB1, COG2, GTF1, RPS23A, YGR114C, PIL1, VAS1, CLB6, NUP57, PDC6, MDR1, CTT1, PPT1, UTP22, YGR111W, YGR122C-A, YGR115C, ASK10, PCP1, YGR109W-B, YGR109W-A, DRN1, VMA21, SHY1, GCD2, YGR122W, YGR107W, YGR121W-A, NNF2                                              |
| BYxYPS | 28 | YPS | 7 | 645497 | 750922 | 0.002065011 | MEP1, TPC1, SPT6, MRP13, TEL2, UTP8, RRP46, DAM1, YGR125W, SRB5, DBF2, NOP7, PRP31, YGR117C, RPL11B, CLD1, ESP1, VOA1, CLB1, COG2, YGR126W, GTF1, SYF2, RPS23A, YGR114C, PIL1, VAS1, CLB6, NUP57, ASN2, PDC6, MDR1, CTT1, PPT1, UTP22, YGR111W, YGR122C-A, YGR115C, ASK10, PCP1, YGR127W, YGR109W-B, YGR109W-A, DRN1, VMA21, SHY1, GCD2, YGR122W, YGR107W, YGR121W-A, NNF2 |
| BYxYPS | 21 | BY  | 7 | 718809 | 801320 | 0.033741162 | RPL24B, FHN1, LSB1, YGR151C, MEP1, SPT6, UTP8, ECL1, CCM1, DAM1, CYS4, YGR125W, PHB1, BTN2, YGR117C, ENP2, YGR137W, COG2, YGR126W, PEX4, TPO2, SYF2, RPS23A, YGR114C, VPS62, PTI1, NUP57, ASN2, CAF130, PPT1, TH14, YGR122C-A, YGR115C, CBF2, RSR1, NAT2, YGR149W, YGR130C, YGR139W, YGR146C-A, YGR127W, PRE9, SKN1, YGR122W, YGR121W-A, YGR153W, GTO1                     |
| BYxYPS | 26 | YPS | 7 | 833108 | 843710 | 0.155461499 | CLC1, LSO2, PSD2, PUS6, YGR168C, MSM1, YIP1                                                                                                                                                                                                                                                                                                                                |
| BYxRM  | 2  | BY  | 8 | 144394 | 192125 | 0.107647236 | ERC1, RPN1, BCD1, PUT2, BRL1, ECM12, SRB2, YHR020W, YHR028W-A, DAP2, THR1, RRM3, YHR033W, MSC7, VMA10, NCP1, SLT2, RRF1, YHR022C-A, VMA16, MYO1, MAS2, YHR032W-A, RPS27B, YHI9, NEL1, YHR032C-A, YHR022C, PIH1                                                                                                                                                             |
| BYxRM  | 9  | RM  | 8 | 457581 | 483296 | 0.104940603 | GND1, STB5, YHR182W, PFS1, SVP26, SSP1, YHR180W-A, GPI16, YHR177W, IKI1, YHR180C-B, YHR182C-A, KOG1, OYE2, YHR180W                                                                                                                                                                                                                                                         |
| BYxYPS | 25 | BY  | 8 | 37676  | 66281  | 0.073334861 | SPO11, ECM29, NPR3, RIM4, GOS1, SNF6, YHL026C, OCA5, YHL030W-A, RIM101, GUT1, OPI1, AIM17, WSC4                                                                                                                                                                                                                                                                            |
| BYxRM  | 10 | RM  | 9 | 102974 | 126569 | 0.042293767 | RRT14, AYR1, TAO3, STH1, KGD1, MET18, ASG1                                                                                                                                                                                                                                                                                                                                 |
| RMxYPS | 11 | RM  | 9 | 83     | 996    | 0.025494016 | YIL177C, YIL177W-A                                                                                                                                                                                                                                                                                                                                                         |

|        |    |     |    |        |        |             |                                                                                                                                                                                                                                                                                                                                      |
|--------|----|-----|----|--------|--------|-------------|--------------------------------------------------------------------------------------------------------------------------------------------------------------------------------------------------------------------------------------------------------------------------------------------------------------------------------------|
| RMxYPS | 13 | RM  | 9  | 83     | 996    | 0.31547553  | YIL177C, YIL177W-A                                                                                                                                                                                                                                                                                                                   |
| RMxYPS | 16 | YPS | 9  | 70698  | 90546  | 0.063848262 | AXL2, TMA108, YIL141W, ATG32, SLN1, NDC80, YIL142C-A, PAN6, REV7, CCT2, TPM2, SSL2                                                                                                                                                                                                                                                   |
| BYxYPS | 29 | YPS | 9  | 108378 | 150602 | 0.001715324 | PRM5, RRT14, AYR1, HIS5, TAO3, QDR2, YIL115W-A, STH1, RHO3, SDP1, KGD1, SIM1, MET18, QDR1, NUP159, POR2, RPI1, POG1                                                                                                                                                                                                                  |
| BYxYPS | 28 | YPS | 9  | 145698 | 170435 | 0.008591062 | PFK26, YIL108W, SLM1, COX5B, MOB1, HPM1, SDP1, HOS4, SHQ1, YIL105W-A, NUP159, SEC24, POR2                                                                                                                                                                                                                                            |
| BYxYPS | 28 | YPS | 9  | 247035 | 250908 | 0.031997294 | VHR1, RGI2, YIL058W                                                                                                                                                                                                                                                                                                                  |
| RMxYPS | 13 | RM  | 10 | 61893  | 67457  | 0.31547553  | UBP12, YJL197C-A, PHO90                                                                                                                                                                                                                                                                                                              |
| RMxYPS | 12 | RM  | 10 | 373527 | 388629 | 0.007353678 | BET4, SNX4, YJL032W, IRC18, LOH1, KAR2, HCA4, MAD2, NUP192, VPS53, TAD2                                                                                                                                                                                                                                                              |
| RMxYPS | 18 | YPS | 10 | 639618 | 692808 | 0.000385758 | SGM1, IBA57, TIM8, YJR115W, HIR3, STR2, MET5, RSF2, XPT1, RPS5, YJR124C, JHD2, YJR120W, EFM3, YJR128W, TTI2, NMD5, HOM6, ENT3, STE24, YJR140W-A, MCM22, ILM1, ATP2, TDA4, MNS1, IML1, VPS70                                                                                                                                          |
| BYxYPS | 22 | BY  | 10 | 422597 | 461507 | 0.043052729 | YJR011C, COX16, AVT1, MHO1, YJR012C, APL1, CTK2, CYR1, OST1, LSO1, SAG1, PRE3, GPI14, YJR003C, MET3, SUI2, SYS1, MPP10, SPC1, TDH2, YJL007C, POL31                                                                                                                                                                                   |
| BYxRM  | 10 | RM  | 11 | 212878 | 221687 | 0.096694763 | PRR1, YKL118W, SRP21, SBA1, VPH2, DGR2, OAC1                                                                                                                                                                                                                                                                                         |
| RMxYPS | 15 | RM  | 11 | 6098   | 43246  | 0.063778622 | YRA2, MCH2, DOA1, JEN1, COS9, SAC1, SRY1, URA1, TRP3, OXP1, STE6, FRE2, UBA1                                                                                                                                                                                                                                                         |
| BYxYPS | 21 | BY  | 11 | 306549 | 361056 | 0.109238733 | YKL044W, MPE1, NUP100, ASK1, MDM35, TMA19, YKL065W-A, YKL068W-A, VPS24, MNR2, YKL063C, TOA2, FBA1, SFK1, PRI2, YET1, OAR1, SPC42, YKL050C, DCW1, BLI1, YKL069W, YKL066W, ELM1, DEF1, MSN4, YKL053W, PHD1, YNK1, YKL070W, CSE4, NUP120, ANR2                                                                                          |
| BYxRM  | 10 | RM  | 12 | 362425 | 388904 | 0.042293767 | YLR120W-A, YLR112W, YLR108C, CFT2, YLR111W, YPS1, MDN1, AHP1, AVL9, CLF1, REX3, YPS3, SRN2, CCW12, HOG1, YLR118C, MSL5                                                                                                                                                                                                               |
| BYxRM  | 1  | BY  | 12 | 627007 | 645539 | 0.143349655 | MCP2, SSP120, IRC20, NDL1, ERF2, SYM1, YLR252W, RCK2, YEF3                                                                                                                                                                                                                                                                           |
| RMxYPS | 18 | YPS | 12 | 111423 | 207072 | 0.000385758 | RAD5, UBR2, SSK1, PPR1, RLP24, DNM1, BPT1, RPL15A, LOT6, NOC3, SSL1, YEH1, AAT2, SPO75, YLR001C, BRE2, PAM18, YLR012C, IZH3, COX17, THI73, ORC3, YLR030W, PML1, ADE16, POM34, SFI1, PUF3, YLL006W-A, DRS1, SDO1, GAT3, PSR1, YLL007C, MEU1, SED5, NSE1, RTT109, EMC6, SNF7, CMS1, TEN1, YLR031W, MMM1, YEH2, DPS1, IRC25, PSR2, SOF1 |
| RMxYPS | 19 | YPS | 12 | 520774 | 538387 | 0.028072187 | SKG3, MMR1, MDL1, TOS4, YLR184W, ATG26, RPL37A, PEX13, EMG1                                                                                                                                                                                                                                                                          |
| RMxYPS | 19 | YPS | 12 | 722344 | 729605 | 0.007614068 | YLR299C-A, EXG1, YLR297W, ATP14, YHC1, YLR296W, ECM38                                                                                                                                                                                                                                                                                |

|        |    |     |    |        |        |             |                                                                                                                                                                                                                                                                                                                                                                           |
|--------|----|-----|----|--------|--------|-------------|---------------------------------------------------------------------------------------------------------------------------------------------------------------------------------------------------------------------------------------------------------------------------------------------------------------------------------------------------------------------------|
|        |    |     |    |        |        |             | MHT1, VPS13, YLL058W, MMP1, JLP1, YLL047W, GRC3, YLL054C, FPS1, RIX7, YLL053C, PRP19, GPI13, RNP1, COF1, YLL032C, YLL059C, GTT2, ATG10, LDB18, UBI4, YCT1, YLL037W, ENT4, AYT1, RPL8B, FRE6, IRC19, YBT1, YLL056C, SDH2, YLL044W, AQY2                                                                                                                                    |
| BYxYPS | 26 | YPS | 12 | 13986  | 79672  | 0.155461499 |                                                                                                                                                                                                                                                                                                                                                                           |
| BYxYPS | 29 | YPS | 12 | 35854  | 85632  | 0.035015252 | RRT7, VPS13, YLL047W, FRA1, GRC3, FPS1, RIX7, YLL053C, PRP19, GPI13, RNP1, COF1, TPO1, YLL032C, ATG10, LDB18, UBI4, YLL037W, ENT4, RPL8B, FRE6, IRC19, YBT1, SDH2, YLL044W, AQY2                                                                                                                                                                                          |
| BYxYPS | 26 | YPS | 12 | 893373 | 904916 | 0.113087961 | REH1, ECM19, RPS29A, SWC7, CCW14, STE23, ART10, VAC14                                                                                                                                                                                                                                                                                                                     |
| BYxRM  | 5  | BY  | 13 | 37888  | 46262  | 0.172241211 | CTK3, ATR1, DAT1, TAF8, VAN1                                                                                                                                                                                                                                                                                                                                              |
| BYxRM  | 2  | BY  | 13 | 70163  | 73368  | 0.083462688 | TSL1, YML100W-A                                                                                                                                                                                                                                                                                                                                                           |
| BYxRM  | 8  | RM  | 13 | 225572 | 310534 | 0.00485162  | YMR013W-A, YAP1, PSP2, ERG5, ADI1, MIX17, YMR001C-A, UNG1, PLB2, YMR013C-A, YML012C-A, YMR010W, MRPL39, BUD22, AIM34, SEC59, PPZ1, GLO1, OST6, YMR018W, SPO20, TRM12, APT1, YPT7, TAF11, YMR007W, RAD33, YML018C, CLU1, MVP1, NSE5, RPS17A, YML007C-A, YML002W, PLB1, CDC5, SOK2, YML020W, UBX2, GIS4, TRM9, YML009C-A, HXT2, TAF4, ERV25, YML003W, ERG6, SPT5, YML009W-B |
| BYxRM  | 6  | RM  | 13 | 232662 | 291877 | 0.056693699 | YAP1, PSP2, ADI1, MIX17, YMR001C-A, PLB2, YML012C-A, YMR010W, MRPL39, AIM34, PPZ1, GLO1, OST6, TRM12, YPT7, TAF11, YMR007W, RAD33, YML018C, CLU1, MVP1, YML007C-A, YML002W, PLB1, CDC5, YML020W, UBX2, GIS4, TRM9, YML009C-A, HXT2, TAF4, ERV25, YML003W, ERG6, SPT5, YML009W-B                                                                                           |
| BYxRM  | 7  | RM  | 13 | 243473 | 298845 | 0.069492625 | YMR013W-A, YAP1, ADI1, MIX17, YMR001C-A, PLB2, YMR013C-A, YML012C-A, YMR010W, MRPL39, AIM34, SEC59, GLO1, TRM12, YPT7, YMR007W, RAD33, CLU1, MVP1, YML007C-A, YML002W, PLB1, CDC5, UBX2, GIS4, TRM9, YML009C-A, HXT2, TAF4, ERV25, YML003W, ERG6, SPT5, YML009W-B                                                                                                         |
| BYxRM  | 9  | RM  | 13 | 244141 | 298845 | 0.001481259 | YMR013W-A, YAP1, ADI1, MIX17, YMR001C-A, PLB2, YMR013C-A, YML012C-A, YMR010W, MRPL39, AIM34, SEC59, GLO1, TRM12, YPT7, YMR007W, RAD33, CLU1, MVP1, YML007C-A, YML002W, PLB1, CDC5, UBX2, GIS4, YML009C-A, HXT2, TAF4, ERV25, YML003W, ERG6, SPT5, YML009W-B                                                                                                               |
| BYxRM  | 5  | BY  | 13 | 478297 | 516134 | 0.491374926 | SHH3, YMR122C, FOL3, PKR1, SPG4, YMR114C, YMR122W-A, HFD1, RPL15B, MYO5, ILV2, ASC1, ADE17, YMR119W-A, MGR3, YMR111C, MED11, YKU80, EPO1,                                                                                                                                                                                                                                 |

|        |    |    |    |        |        |             |                                                                                                                                                                                                                                                                                                          |
|--------|----|----|----|--------|--------|-------------|----------------------------------------------------------------------------------------------------------------------------------------------------------------------------------------------------------------------------------------------------------------------------------------------------------|
|        |    |    |    |        |        |             | ASI1, SPC24                                                                                                                                                                                                                                                                                              |
| RMxYPS | 11 | RM | 13 | 215391 | 274252 | 0.004766449 | YAP1, PSP2, MIX17, YMR001C-A, TSA1, UNG1, YML012C-A, NDC1, MRPL39, AIM34, RPS18B, USA1, PP21, GLO1, OST6, TRM12, APT1, YPT7, TAF11, RCF1, YOX1, RAD33, YML018C, MVP1, NSE5, RPS17A, YML007C-A, YML002W, YML6, CDC5, YML020W, UBX2, GIS4, TRM9, YML009C-A, ERV25, YML003W, ERG6, SPT5, YML009W-B          |
| RMxYPS | 12 | RM | 13 | 247126 | 283371 | 0.007353678 | YAP1, MIX17, YMR001C-A, PLB2, MRPL39, AIM34, GLO1, TRM12, YPT7, YMR007W, RAD33, MVP1, YML007C-A, YML002W, PLB1, CDC5, GIS4, YML009C-A, TAF4, YML003W, ERG6, SPT5, YML009W-B                                                                                                                              |
| RMxYPS | 14 | RM | 13 | 247466 | 305906 | 0.007061165 | YMR013W-A, YAP1, ERG5, ADI1, MIX17, YMR001C-A, PLB2, YMR013C-A, YMR010W, MRPL39, BUD22, AIM34, SEC59, GLO1, TRM12, YPT7, YMR007W, CLU1, MVP1, YML007C-A, YML002W, PLB1, CDC5, SOK2, GIS4, YML009C-A, HXT2, TAF4, YML003W, ERG6, SPT5, YML009W-B                                                          |
| RMxYPS | 13 | RM | 13 | 253616 | 305303 | 0.003780424 | YMR013W-A, YAP1, ERG5, ADI1, MIX17, YMR001C-A, PLB2, YMR013C-A, YMR010W, BUD22, AIM34, SEC59, GLO1, TRM12, YPT7, YMR007W, CLU1, MVP1, YML002W, PLB1, CDC5, SOK2, GIS4, HXT2, TAF4, YML003W                                                                                                               |
| BYxYPS | 21 | BY | 13 | 24474  | 93961  | 0.033741162 | RPM2, YML119W, SEC65, CTK3, YML122C, ZDS2, YML094C-A, YML089C, ATR1, GIM5, TSL1, GTR1, YML101C-A, YML099W-A, YML116W-A, NUP188, DAT1, ARG81, MDM1, YML090W, YML100W-A, YML108W, VPS9, NAB6, PML39, COQ5, TAF13, UTP14, NDI1, TAF8, CAC2, BUL2, NGL3, YML096W, URA5, PHO84, CUE4, RAD10, VAN1, UFO1, PRE8 |
| BYxYPS | 23 | BY | 13 | 51084  | 102554 | 0.245655034 | RPM2, SEC65, YML082W, ZDS2, YML094C-A, YML089C, ALO1, GIM5, TSL1, YML101C-A, YML099W-A, NUP188, YML083C, ARG81, MDM1, YML090W, YML100W-A, YML108W, VPS9, TUB1, PML39, AIM33, TAF13, UTP14, CAC2, YML084W, YML096W, URA5, CUE4, RAD10, UFO1, PRE8                                                         |
| BYxYPS | 23 | BY | 13 | 512216 | 551554 | 0.245655034 | STO1, ERG29, PKR1, CIN4, DLT1, RRB1, RPL13B, YMR135W-A, GID8, RIM11, JLP2, YMR141C, YMR141W-A, POM152, GAT2, SIP5, EPO1, REC114, PSO2, YMR130W, ECM16, SAS2                                                                                                                                              |
| BYxYPS | 22 | BY | 13 | 672760 | 674283 | 0.01357787  | PFK2                                                                                                                                                                                                                                                                                                     |
| BYxRM  | 1  | BY | 14 | 231035 | 282033 | 0.008827553 | YNL203C, RRG9, SPS18, YNL195C, RIO2, YNL217W, YNL208W, GCR2,                                                                                                                                                                                                                                             |

|        |    |    |    |        |        |             |                                                                                                                                                                                                                                                                                                                                                                                                                                                                                                                                    |
|--------|----|----|----|--------|--------|-------------|------------------------------------------------------------------------------------------------------------------------------------------------------------------------------------------------------------------------------------------------------------------------------------------------------------------------------------------------------------------------------------------------------------------------------------------------------------------------------------------------------------------------------------|
|        |    |    |    |        |        |             | ADE12, MER1, YNL194C, SPS19, PEX17, YNL193W, YNL211C, YNL198C, RTT106, MGS1, WHI3, IES2, PSY2, CHS1, YNL205C, ALG9, SLZ1, VID27, SSB2, YNL200C, RAP1, POP1, DUG3                                                                                                                                                                                                                                                                                                                                                                   |
| BYxRM  | 3  | BY | 14 | 244309 | 298111 | 0.120168868 | YNL203C, RRG9, SPS18, IPI3, SRP1, YNL195C, RIO2, YNL208W, UBP10, YNL190W, SWT21, GCR2, MER1, YNL194C, SPS19, PEX17, NPR1, YNL193W, YNL211C, YNL198C, RTT106, WHI3, IES2, PSY2, YNL184C, CHS1, YNL205C, KAR1, SLZ1, VID27, SSB2, YNL200C, MRPL19, DUG3                                                                                                                                                                                                                                                                              |
| BYxRM  | 1  | BY | 14 | 441346 | 467221 | 0.008827553 | PHO23, YPT53, APP1, RHO2, TCB2, YNL089C, YNL095C, YNL097W-A, NST1, RPS7B, SNN1, TOP2, YNL092W, MKT1                                                                                                                                                                                                                                                                                                                                                                                                                                |
| BYxRM  | 2  | BY | 14 | 445768 | 467221 | 0.003769973 | YPT53, APP1, RHO2, TCB2, YNL089C, YNL095C, NST1, SNN1, TOP2, YNL092W, MKT1                                                                                                                                                                                                                                                                                                                                                                                                                                                         |
| RMxYPS | 15 | RM | 14 | 116882 | 145579 | 0.001132588 | TOF1, PIK1, MET2, ALP1, LYP1, GOR1, YNL266W, IST1, BNI1, SEC2, BOR1, PDR17, YNL276C, BSC4                                                                                                                                                                                                                                                                                                                                                                                                                                          |
| RMxYPS | 13 | RM | 14 | 119277 | 265691 | 0.138936379 | YNL203C, RRG9, YNL228W, CSL4, SPS18, TOF1, MPA43, LAP3, GIS2, CNM67, NAR1, ATG2, YTP1, RIO2, YNL217W, YNL208W, PIK1, CWC25, YNL235C, NRD1, GCR2, BNI4, ALP1, LYP1, ADE12, MER1, ZWF1, SPS19, PEX17, GOR1, YNL266W, RPA49, SQS1, FOL1, YNL211C, YNL234W, RTT106, MGS1, POL2, ATG4, SUI1, MRPL17, IES2, PSY2, IST1, BNI1, SIP3, YNL247W, JJJ1, ELA1, URE2, SEC2, YNL205C, ALG9, DSL1, BOR1, ORC5, SLA2, TEX1, VID27, PDR16, PDR17, SSB2, YIF1, SSU72, KEX2, RTC4, SIN4, YNL200C, RAP1, BSC4, ATX1, LTO1, POP1, RAD50, YNL226W, VPS75 |
| RMxYPS | 12 | RM | 14 | 149055 | 256858 | 0.088672194 | RRG9, YNL228W, CSL4, MPA43, LAP3, GIS2, CNM67, NAR1, ATG2, YTP1, RIO2, YNL217W, YNL208W, CWC25, YNL235C, NRD1, BNI4, ADE12, MER1, ZWF1, PEX17, RPA49, SQS1, FOL1, YNL211C, YNL234W, RTT106, MGS1, POL2, ATG4, SUI1, MRPL17, IES2, SIP3, YNL247W, JJJ1, ELA1, URE2, ALG9, DSL1, ORC5, SLA2, TEX1, VID27, PDR16, SSB2, SSU72, KEX2, RTC4, SIN4, RAP1, ATX1, LTO1, POP1, RAD50, YNL226W, VPS75                                                                                                                                        |
| RMxYPS | 15 | RM | 14 | 481385 | 579135 | 0.004028506 | RNH201, YDJ1, HHT2, BOP3, LAP2, YNL028W, RPL9B, APJ1, RPL16B, COG5, YNL035C, MSK1, MTQ1, SIW14, POR1, COX5A, MLF3, FKH2, OCA2, NCE103, YNL054W-B, YNL054W-A, YIP3, GPI15, YNL042W-B, SUN4, TOM7, YNL040W, MSG5, IMP4, YNL033W, YNL058C, GCD10, SLM2, COG6, AQR1, HHF2, LAT1, YNL057W,                                                                                                                                                                                                                                              |

|        |    |    |    |        |        |             |                                                                                                                                                                                                                                                                                                                                                                                                                                                                                                                                                                                                                                                                                                                                                  |
|--------|----|----|----|--------|--------|-------------|--------------------------------------------------------------------------------------------------------------------------------------------------------------------------------------------------------------------------------------------------------------------------------------------------------------------------------------------------------------------------------------------------------------------------------------------------------------------------------------------------------------------------------------------------------------------------------------------------------------------------------------------------------------------------------------------------------------------------------------------------|
|        |    |    |    |        |        |             | IDH1, BDP1, NOP2, YNL034W, ARP5, YNL043C, YNL050C, ALG11, KTR5, MKS1, YNL067W-A, YNL046W, YNL067W-B, VAC7, SFB2                                                                                                                                                                                                                                                                                                                                                                                                                                                                                                                                                                                                                                  |
| RMxYPS | 14 | RM | 14 | 739359 | 751723 | 0.106963807 | YNR062C, YNR061C, FRE4, YNR065C, YNR064C, YNR063W                                                                                                                                                                                                                                                                                                                                                                                                                                                                                                                                                                                                                                                                                                |
| BYxYPS | 22 | BY | 14 | 70598  | 90032  | 0.125418612 | YNL295W, PUS4, CLA4, YNL296W, MSB3, MON2, RFC3, RIM21, PCL1, MID1                                                                                                                                                                                                                                                                                                                                                                                                                                                                                                                                                                                                                                                                                |
| BYxYPS | 22 | BY | 14 | 318592 | 488761 | 0.01357787  | PHO23, MET4, FMP41, RPC19, INN1, YNL122C, YNL114C, RIA1, YNL162W-A, MFA2, YPT53, MLS1, YAF9, APJ1, FAR11, EOS1, NIS1, YNL109W, TPM1, CPT1, ALF1, CUZ1, MIC27, THO2, AAH1, MSK1, NMA111, YGP1, END3, NCS2, YNL134C, YNL146W, APP1, MLF3, LEU4, TEP1, RPC31, DBP2, SAL1, BNI5, PGA2, SRV2, YCK2, AVT4, RHO2, IBD2, DMA2, DGR1, NAF1, PGA1, TCB2, FYV6, YNL089C, YNL095C, ASI2, YNL144W-A, CBK1, YNL150W, RRT16, CYB5, IMP4, NRK1, YNL144C, YNL120C, YNL097W-A, DCP2, IGO1, FPR1, NAM9, LSM7, NST1, YNL097C-B, YNL165W, RPL42A, ESBP6, YNL115C, MEP2, YNL146C-A, RAS2, PMS1, SKO1, KRE33, RPS7B, GIM3, YNL143C, POL1, SWS2, TOM70, YSF3, SNN1, YNL103W-A, EAF7, NSG2, YNL140C, TOP2, YNL092W, NOP15, MKS1, SPC98, INP52, OCA1, MKT1, YNL108C, TOM22 |
| BYxYPS | 23 | BY | 14 | 442650 | 532222 | 0.003984867 | RNH201, YD11, YPT53, RPL9B, APJ1, RPL16B, EOS1, NIS1, TPM1, MSK1, MTQ1, POR1, END3, COX5A, APP1, MLF3, FKH2, SAL1, OCA2, YNL054W-B, YNL054W-A, RHO2, SUN4, TOM7, MSG5, TCB2, YNL089C, YNL095C, IMP4, YNL058C, GCD10, NST1, AQR1, LAT1, YNL057W, PMS1, RPS7B, SWS2, NOP2, ARP5, SNN1, TOP2, YNL092W, MKS1, YNL067W-A, YNL067W-B, VAC7, MKT1                                                                                                                                                                                                                                                                                                                                                                                                       |
| BYxYPS | 25 | BY | 14 | 466586 | 468490 | 0.002028799 | SNN1, MKT1                                                                                                                                                                                                                                                                                                                                                                                                                                                                                                                                                                                                                                                                                                                                       |
| BYxYPS | 23 | BY | 14 | 660540 | 689793 | 0.245655034 | ATP23, TIM23, RCF2, YNR021W, MPP6, YNR029C, ARE2, HUB1, PPG1, BUD17, SEC12, ALG12, CPR8, SNF12, ABZ1, ACC1, MRPL50, YNR025C, SSK2                                                                                                                                                                                                                                                                                                                                                                                                                                                                                                                                                                                                                |
| BYxRM  | 1  | BY | 15 | 125569 | 184291 | 0.032620126 | YOL099C, TPT1, ADH1, MSH2, MPD2, TRM10, IZH4, ATG34, RFC4, HAL9, WRS1, DUF1, REX4, YPQ1, PKH2, PHM7, YOL085C, YOL083C-A, IRA2, YOL079W, YOL085W-A, COQ3, YOL097W-A, SPO21, ITR2, MHF1, YOL098C, HMI1, ATG19, AVO1                                                                                                                                                                                                                                                                                                                                                                                                                                                                                                                                |
| BYxRM  | 2  | BY | 15 | 172956 | 195072 | 0.013560214 | ATP19, MDM20, YOL075C, THP1, REX4, IRA2, YOL079W, BRX1, DSC2, AVO1                                                                                                                                                                                                                                                                                                                                                                                                                                                                                                                                                                                                                                                                               |
| BYxRM  | 4  | BY | 15 | 202012 | 212987 | 0.339183462 | CRT10, MET22, PRS5, INP54, APM4, RIB2, RTG1                                                                                                                                                                                                                                                                                                                                                                                                                                                                                                                                                                                                                                                                                                      |

|        |    |     |    |        |        |             |                                                                                                                                                                                                                                                                                                                                                                                                                                                                                                     |
|--------|----|-----|----|--------|--------|-------------|-----------------------------------------------------------------------------------------------------------------------------------------------------------------------------------------------------------------------------------------------------------------------------------------------------------------------------------------------------------------------------------------------------------------------------------------------------------------------------------------------------|
| BYxRM  | 3  | BY  | 15 | 202087 | 240094 | 0.253092233 | MAM3, ARG1, GAL11, GPD2, CRT10, MET22, PSH1, PRS5, INP54, DDR2, YOL057W, APM4, AIM39, RIB2, GPM3, GSH2, SPE2, RTG1, YOL050C, THI20                                                                                                                                                                                                                                                                                                                                                                  |
| RMxYPS | 15 | RM  | 15 | 232036 | 274962 | 0.063778622 | SMC5, YOL046C, GAL11, YOL029C, NGL1, MSE1, RPP2A, LAG2, YOL037C, RRT8, YOL038C-A, LDS2, OPI10, PEX15, YAP7, NTG2, MIM1, YOL036W, RPS15, GSH2, SIL1, PRE6, SPE2, MDM38, YOL035C, PSK2, YOL050C, GAS5, NOP12                                                                                                                                                                                                                                                                                          |
| RMxYPS | 16 | YPS | 15 | 496695 | 521081 | 0.006706095 | NUP1, YOR093C, YOR102W, RPS7A, VAM3, RKI1, RAS1, ECM3, YOR105W, CRC1, ARF3, OST2, KTR1, PIN2, YOR097C                                                                                                                                                                                                                                                                                                                                                                                               |
| RMxYPS | 18 | YPS | 15 | 943688 | 969591 | 0.065974632 | UBC11, MRS2, RPA190, ALA1, VMA4, RPA43, YOR342C, YOR338W, KRE5, YOR333C, YOR343C, YOR335W-A, YOR331C, TEA1                                                                                                                                                                                                                                                                                                                                                                                          |
| BYxYPS | 22 | BY  | 15 | 170    | 10912  | 0.125418612 | YOL163W, YOL166C, YOL162W, AAD15, YOL166W-A, BDS1, YOL164W-A                                                                                                                                                                                                                                                                                                                                                                                                                                        |
| BYxYPS | 22 | BY  | 15 | 88581  | 216399 | 0.043052729 | YOL099C, MAM3, MDY2, TPT1, YOL118C, ADH1, MSH2, CRT10, MPD2, ATP19, MET22, MDM20, TRM10, IZH4, MSB4, ATG34, INO4, YOL106W, RFC4, YOL075C, PRS5, HAL9, THP1, HST1, HRP1, WSC3, MCH4, WRS1, DUF1, ZEO1, INP54, SDH5, REX4, RRI2, MSN1, APM4, NUF2, SMF1, YPQ1, PKH2, SKM1, PHM7, RIB2, YOL085C, YOL083C-A, IRA2, YOL114C, YOL079W, YOL103W-B, YOL103W-A, YOL085W-A, NDJ1, COQ3, YOL097W-A, RPL18A, NBA1, SPO21, ITR2, BRX1, MHF1, RTG1, YOL098C, SHR5, RPS19A, YOL107W, HMI1, PAP2, DSC2, ATG19, AVO1 |
| BYxYPS | 26 | YPS | 15 | 215865 | 244803 | 0.155461499 | MAM3, YOL046C, ARG1, GAL11, GPD2, PSH1, DDR2, YOL057W, RRT8, LDS2, AIM39, GPM3, GSH2, SPE2, PSK2, YOL050C, THI20                                                                                                                                                                                                                                                                                                                                                                                    |
| BYxYPS | 26 | YPS | 15 | 380731 | 397645 | 0.155461499 | EXO1, HMS1, CIN5, YOR032W-A, CRS5, BUB3, YOR034C-A, YOR029W, AKR2, DFG16, STI1                                                                                                                                                                                                                                                                                                                                                                                                                      |
| BYxYPS | 26 | YPS | 15 | 764185 | 768822 | 0.113087961 | HER1, MCP1, WTM2                                                                                                                                                                                                                                                                                                                                                                                                                                                                                    |
| RMxYPS | 18 | YPS | 16 | 465889 | 562779 | 0.065974632 | ISM1, YPL039W, RMI1, PMA2, RET3, PDH1, NCR1, SGF11, YPL044C, SRL4, SUV3, VTC3, ULP1, SNF8, NOP4, EGD1, SMA1, RQC2, HST2, CIT3, ERG10, MET12, YPL038W-A, TAF3, AEP3, SSN3, ELC1, YPR002C-A, TRM44, CHL1, SWI1, HAT1, YPL034W, RRP12, LSP1, SKS1, YPL025C, PHO85, RAD1, MET31, YPL041C, CTF19, YPL035C, ECM23, YPR003C, TFC8, IRC15, SVL3, VPS16, YPL014W, ULA1, MRPS16                                                                                                                               |
| RMxYPS | 19 | YPS | 16 | 501341 | 611686 | 0.002425991 | YPR015C, RMI1, RET3, PDH1, NCR1, YPR011C, YPR010C-A, VTC3, ULP1,                                                                                                                                                                                                                                                                                                                                                                                                                                    |



|        |    |     |    |        |        |             |                                                                                                                                                                                                                                                                                                                                                                                                                                                                                                                                                                                                                                                                                                                                                                                                                                                                                                                                                                                                          |
|--------|----|-----|----|--------|--------|-------------|----------------------------------------------------------------------------------------------------------------------------------------------------------------------------------------------------------------------------------------------------------------------------------------------------------------------------------------------------------------------------------------------------------------------------------------------------------------------------------------------------------------------------------------------------------------------------------------------------------------------------------------------------------------------------------------------------------------------------------------------------------------------------------------------------------------------------------------------------------------------------------------------------------------------------------------------------------------------------------------------------------|
|        |    |     |    |        |        |             | ICL2, SNF8, ATP20, TIF6, RQC2, HST2, CIT3, EAF3, YPR012W, YME1, MET12, CMR3, HAL1, TAF3, AEP3, DSS4, YPR002C-A, CHL1, SWI1, SUT2, HAT1, RRP12, AIM45, LSP1, YPR022C, RLF2, SKS1, YPL025C, RAD1, HAA1, YPR014C, CTF19, ECM23, YPR003C, TFC8, IRC15, YPR016W-A, AGC1, MCM4, RPA135, YPL014W, ULA1, REC8, MRPS16                                                                                                                                                                                                                                                                                                                                                                                                                                                                                                                                                                                                                                                                                            |
| RMxYPS | 20 | YPS | 16 | 504837 | 747971 | 0.000456378 | TIF5, YPR015C, YPR084W, NHP6A, CCL1, TAH18, YPR109W, ARP7, RDS3, RET3, SEC8, FHL1, PDH1, NCR1, YPR063C, LTP1, SRO7, YPR011C, YPR010C-A, VTC3, ULP1, ICL2, SNF8, MED1, HOS1, MDM36, TFB4, ATP20, VMA13, TIF6, UBA3, IRC16, RQC2, HST2, CIT3, SNT309, EAF3, HTS1, YMC1, FCY1, TIP41, COG4, YPR012W, YME1, VPS69, YPR053C, YPR074W-A, MET12, SYT1, YPR089W, CMR3, OPY2, HAL1, TAF3, AEP3, DIB1, YPR098C, DSS4, YPR027C, ERV2, TKL1, MRPL51, MSF1, YPR002C-A, YPR039W, YPR096C, RPL11A, CHL1, SWI1, YPR078C, NVJ2, SUT2, HAT1, ROX1, CSR2, YPR071W, RPL43A, YPR050C, SUA7, THP3, DBF20, SRP54, APL4, YPR092W, RRP12, AIM45, LSP1, YPR076W, GRS2, YPR059C, YPR022C, RLF2, JID1, RPN7, BRR1, RAD1, MRL1, NOT5, HAA1, YPR064W, NTO1, MCM16, SMK1, ASA1, ATH1, ATG11, YPR099C, YPR014C, CTF19, ECM23, YPR097W, PRE2, YPR003C, TFC8, IRC15, YPR016W-A, ISR1, TEF1, SPE3, MAK3, YPR108W-A, GLN1, AGC1, ARO7, MCM4, RPC40, PUF2, OPI11, RPA135, SPO24, YPL014W, YOP1, ASR1, YTH1, ULA1, YPR077C, ISA2, REC8, MRPS16 |
| RMxYPS | 17 | YPS | 16 | 526392 | 677025 | 0.003060262 | TIF5, YPR015C, NHP6A, CCL1, TAH18, ARP7, RET3, SEC8, PDH1, NCR1, SRO7, YPR011C, YPR010C-A, ICL2, SNF8, TFB4, ATP20, VMA13, TIF6, IRC16, RQC2, HST2, CIT3, EAF3, HTS1, YMC1, TIP41, YPR012W, YME1, YPR053C, CMR3, HAL1, TAF3, AEP3, DSS4, YPR027C, ERV2, MSF1, YPR002C-A, YPR039W, CHL1, SUT2, HAT1, CSR2, RPL43A, YPR050C, THP3, APL4, RRP12, AIM45, LSP1, YPR059C, YPR022C, RLF2, JID1, BRR1, HAA1, NTO1, MCM16, SMK1, ATH1, ATG11, YPR014C, YPR003C, TFC8, YPR016W-A, MAK3, GLN1, AGC1, ARO7, MCM4, PUF2, OPI11, RPA135, SPO24, YPL014W, YOP1, ULA1, REC8, MRPS16                                                                                                                                                                                                                                                                                                                                                                                                                                      |
| RMxYPS | 19 | YPS | 16 | 787032 | 792213 | 0.028072187 | ANT1, CTR1, YLH47, YPR126C, YPR127W                                                                                                                                                                                                                                                                                                                                                                                                                                                                                                                                                                                                                                                                                                                                                                                                                                                                                                                                                                      |

|        |    |     |    |        |        |             |                                                                                                                                                                          |
|--------|----|-----|----|--------|--------|-------------|--------------------------------------------------------------------------------------------------------------------------------------------------------------------------|
| RMxYPS | 20 | YPS | 16 | 832297 | 837009 | 0.081297613 | PIN3, YPR153W, URN1, NCA2                                                                                                                                                |
| RMxYPS | 19 | YPS | 16 | 900008 | 947540 | 0.002425991 | RPC82, PZF1, YPR203W, YPR202W, HPA2, DPM1, OPT2, SKI3, RPO26, YPR197C, ARR2, SGE1, ARR3, AQY1, MLC2, YPR196W, YPR204C-A, QCR2, ARR1, ATG13, YPR204W, YPR195C, GDB1, SMX3 |
| RMxYPS | 20 | YPS | 16 | 901087 | 923983 | 0.000456378 | RPC82, PZF1, HPA2, DPM1, SKI3, RPO26, AQY1, MLC2, QCR2, ATG13, GDB1                                                                                                      |
| RMxYPS | 17 | YPS | 16 | 919896 | 924612 | 0.003060262 | HPA2, OPT2, AQY1, QCR2                                                                                                                                                   |
| RMxYPS | 18 | YPS | 16 | 922561 | 927175 | 0.000385758 | HPA2, OPT2, AQY1                                                                                                                                                         |
| BYxYPS | 28 | YPS | 16 | 898150 | 942359 | 0.002065011 | RPC82, PZF1, HPA2, DPM1, OPT2, SKI3, RPO26, YPR197C, ARR2, SGE1, ARR3, AQY1, SEC23, MLC2, YPR196W, QCR2, ARR1, ATG13, YPR195C, GDB1, SMX3                                |
| BYxYPS | 30 | YPS | 16 | 914217 | 918565 | 0.001861178 | RPC82, SKI3                                                                                                                                                              |
| BYxYPS | 29 | YPS | 16 | 914775 | 946418 | 0.00922265  | RPC82, YPR203W, YPR202W, HPA2, OPT2, SKI3, YPR197C, ARR2, SGE1, ARR3, AQY1, YPR196W, QCR2, ARR1, YPR204W, YPR195C                                                        |
| BYxYPS | 26 | YPS | 16 | 922477 | 946418 | 0.055277584 | YPR203W, YPR202W, HPA2, OPT2, YPR197C, ARR2, SGE1, ARR3, AQY1, YPR196W, ARR1, YPR204W, YPR195C                                                                           |

This table shows all loci genome-wide that reached at least nominal significance within all three crosses using a one-tailed exact binomial test. The bounds of each interval were determined by the nominal significance cut-off for each family. All open reading frames, confirmed and dubious, are provided.

**Table S3.** Phenotype data for reciprocal hemizyosity and marked allele replacement assays.

| Technique | Date     | Strain *     | MIC(mM) | Chr | Cross |
|-----------|----------|--------------|---------|-----|-------|
| M.A.R.    | 1/14/15  | AEP3(Y-R)15a | 5       | 16  | RxY   |
| M.A.R.    | 1/14/15  | AEP3(Y-R)15b | 5       | 16  | RxY   |
| M.A.R.    | 1/14/15  | AEP3(Y-R)19a | 4.5     | 16  | RxY   |
| M.A.R.    | 1/14/15  | AEP3(Y-R)19b | 4.5     | 16  | RxY   |
| M.A.R.    | 1/14/15  | AEP3(Y-R)19c | 4.5     | 16  | RxY   |
| M.A.R.    | 1/14/15  | 20dD4aa      | 5       | NA  | RxY   |
| M.A.R.    | 1/14/15  | 20dD4ab      | 5.5     | NA  | RxY   |
| M.A.R.    | 1/14/15  | 20dD4ac      | 5.5     | NA  | RxY   |
| M.A.R.    | 1/14/15  | 20dD4ba      | 5.5     | NA  | RxY   |
| M.A.R.    | 1/14/15  | 20dD4bb      | 6       | NA  | RxY   |
| M.A.R.    | 2/4/2015 | SDP1(Y-B)5a  | 3.5     | 9   | BxY   |
| M.A.R.    | 2/4/2015 | SDP1(Y-B)5b  | 3.5     | 9   | BxY   |
| M.A.R.    | 2/4/2015 | SDP1(Y-B)5c  | 3.5     | 9   | BxY   |
| M.A.R.    | 2/4/2015 | SDP1(Y-B)12a | 5.5     | 9   | BxY   |
| M.A.R.    | 2/4/2015 | SDP1(Y-B)12b | 5.5     | 9   | BxY   |
| M.A.R.    | 2/4/2015 | SDP1(Y-B)12c | 5       | 9   | BxY   |
| M.A.R.    | 2/4/2015 | 29gC1aa      | 6       | NA  | BxY   |
| M.A.R.    | 2/4/2015 | 29gC1ab      | 6       | NA  | BxY   |
| M.A.R.    | 2/4/2015 | 29gC1ac      | 6       | NA  | BxY   |
| M.A.R.    | 2/4/2015 | 29gC1ba      | 5.5     | NA  | BxY   |
| M.A.R.    | 2/4/2015 | 29gC1bb      | 5.5     | NA  | BxY   |
| M.A.R.    | 2/4/2015 | 29gC1bc      | 6       | NA  | BxY   |
| M.A.R.    | 2/4/2015 | 29gC1ca      | 6.5     | NA  | BxY   |
| M.A.R.    | 2/4/2015 | 29gC1cb      | 6.5     | NA  | BxY   |
| M.A.R.    | 2/4/2015 | 29gC1cc      | 7       | NA  | BxY   |
| M.A.R.    | 1/19/15  | CTT1(Y-R)14a | 4.5     | 7   | RxY   |
| M.A.R.    | 1/19/15  | CTT1(Y-R)14b | 4.5     | 7   | RxY   |
| M.A.R.    | 1/19/15  | CTT1(Y-R)14c | 5       | 7   | RxY   |
| M.A.R.    | 1/19/15  | CTT1(Y-R)16a | 4.5     | 7   | RxY   |
| M.A.R.    | 1/19/15  | CTT1(Y-R)16b | 4.5     | 7   | RxY   |
| M.A.R.    | 1/19/15  | CTT1(Y-R)16c | 4.5     | 7   | RxY   |
| M.A.R.    | 1/19/15  | CTT1(Y-R)6a  | 4.5     | 7   | RxY   |
| M.A.R.    | 1/19/15  | CTT1(Y-R)6b  | 4.5     | 7   | RxY   |
| M.A.R.    | 1/19/15  | CTT1(Y-R)6c  | 4.5     | 7   | RxY   |
| M.A.R.    | 1/19/15  | 16eD7aa      | 5.5     | NA  | RxY   |
| M.A.R.    | 1/19/15  | 16eD7ab      | 5       | NA  | RxY   |
| M.A.R.    | 1/19/15  | 16eD7ac      | 5.5     | NA  | RxY   |
| M.A.R.    | 1/19/15  | 16eD7ba      | 4.5     | NA  | RxY   |

|        |         |               |     |    |     |
|--------|---------|---------------|-----|----|-----|
| M.A.R. | 1/19/15 | 16eD7bb       | 5   | NA | RxY |
| M.A.R. | 1/19/15 | 16eD7bc       | 5   | NA | RxY |
| M.A.R. | 1/19/15 | MMS21(Y-B)11a | 5   | 5  | BxY |
| M.A.R. | 1/19/15 | MMS21(Y-B)11b | 5.5 | 5  | BxY |
| M.A.R. | 1/19/15 | MMS21(Y-B)11c | 5.5 | 5  | BxY |
| M.A.R. | 1/19/15 | MMS21(Y-B)13a | 5   | 5  | BxY |
| M.A.R. | 1/19/15 | MMS21(Y-B)13b | 5.5 | 5  | BxY |
| M.A.R. | 1/19/15 | MMS21(Y-B)13c | 5.5 | 5  | BxY |
| M.A.R. | 1/19/15 | MMS21(Y-B)6a  | 4   | 5  | BxY |
| M.A.R. | 1/19/15 | MMS21(Y-B)6b  | 4   | 5  | BxY |
| M.A.R. | 1/19/15 | MMS21(Y-B)6c  | 3.5 | 5  | BxY |
| M.A.R. | 1/19/15 | 29gC1aa       | 5   | NA | BxY |
| M.A.R. | 1/19/15 | 29gC1ab       | 6.5 | NA | BxY |
| M.A.R. | 1/19/15 | 29gC1ac       | 5.5 | NA | BxY |
| M.A.R. | 1/19/15 | 29gC1ba       | 5   | NA | BxY |
| M.A.R. | 1/19/15 | 29gC1bb       | 6   | NA | BxY |
| M.A.R. | 1/19/15 | 29gC1bc       | 6   | NA | BxY |
| M.A.R. | 1/26/15 | MRP13(Y-B)15a | 5.5 | 7  | BxY |
| M.A.R. | 1/26/15 | MRP13(Y-B)15b | 5.5 | 7  | BxY |
| M.A.R. | 1/26/15 | MRP13(Y-B)15c | 5.5 | 7  | BxY |
| M.A.R. | 1/26/15 | MRP13(Y-B)3a  | 5   | 7  | BxY |
| M.A.R. | 1/26/15 | MRP13(Y-B)3b  | 5.5 | 7  | BxY |
| M.A.R. | 1/26/15 | MRP13(Y-B)3c  | 5.5 | 7  | BxY |
| M.A.R. | 1/26/15 | 29gC1aa       | 5.5 | NA | BxY |
| M.A.R. | 1/26/15 | 29gC1ab       | 6   | NA | BxY |
| M.A.R. | 1/26/15 | 29gC1ac       | 5.5 | NA | BxY |
| M.A.R. | 1/26/15 | 29gC1ba       | 6   | NA | BxY |
| M.A.R. | 1/26/15 | 29gC1bb       | 6   | NA | BxY |
| M.A.R. | 1/26/15 | 29gC1bc       | 6   | NA | BxY |
| M.A.R. | 1/26/15 | 29gC1ca       | 5.5 | NA | BxY |
| M.A.R. | 1/26/15 | 29gC1cb       | 5.5 | NA | BxY |
| M.A.R. | 1/26/15 | 29gC1cc       | 5.5 | NA | BxY |
| M.A.R. | 3/8/15  | AQY1(Y-B)10a  | 6   | 16 | BxY |
| M.A.R. | 3/8/15  | AQY1(Y-B)10b  | 6.5 | 16 | BxY |
| M.A.R. | 3/8/15  | AQY1(Y-B)10c  | 6.5 | 16 | BxY |
| M.A.R. | 3/8/15  | AQY1(Y-B)12a  | 6   | 16 | BxY |
| M.A.R. | 3/8/15  | AQY1(Y-B)12b  | 6   | 16 | BxY |
| M.A.R. | 3/8/15  | AQY1(Y-B)12c  | 6.5 | 16 | BxY |
| M.A.R. | 3/8/15  | AQY1(Y-B)15a  | 6.5 | 16 | BxY |
| M.A.R. | 3/8/15  | AQY1(Y-B)15b  | 6.5 | 16 | BxY |
| M.A.R. | 3/8/15  | AQY1(Y-B)15c  | 6   | 16 | BxY |

|        |        |              |     |    |     |
|--------|--------|--------------|-----|----|-----|
| M.A.R. | 3/8/15 | AQY1(Y-B)17a | 6   | 16 | BxY |
| M.A.R. | 3/8/15 | AQY1(Y-B)17b | 6.5 | 16 | BxY |
| M.A.R. | 3/8/15 | AQY1(Y-B)17c | 6   | 16 | BxY |
| M.A.R. | 3/8/15 | AQY1(Y-B)20a | 6.5 | 16 | BxY |
| M.A.R. | 3/8/15 | AQY1(Y-B)20b | 6   | 16 | BxY |
| M.A.R. | 3/8/15 | AQY1(Y-B)20c | 6.5 | 16 | BxY |
| M.A.R. | 3/8/15 | 29gC1_a1     | 6   | NA | BxY |
| M.A.R. | 3/8/15 | 29gC1_a2     | 6.5 | NA | BxY |
| M.A.R. | 3/8/15 | 29gC1_a3     | 6.5 | NA | BxY |
| M.A.R. | 3/8/15 | 29gC1_b1     | 6.5 | NA | BxY |
| M.A.R. | 3/8/15 | 29gC1_b2     | 6.5 | NA | BxY |
| M.A.R. | 3/8/15 | 29gC1_b3     | 6.5 | NA | BxY |
| M.A.R. | 3/8/15 | 29gC1_c1     | 6.5 | NA | BxY |
| M.A.R. | 3/8/15 | 29gC1_c2     | 6.5 | NA | BxY |
| M.A.R. | 3/8/15 | 29gC1_c3     | 7   | NA | BxY |
| M.A.R. | 3/8/15 | AQY1(Y-R)12a | 5.5 | 16 | RxY |
| M.A.R. | 3/8/15 | AQY1(Y-R)12b | 5.5 | 16 | RxY |
| M.A.R. | 3/8/15 | AQY1(Y-R)12c | 5.5 | 16 | RxY |
| M.A.R. | 3/8/15 | AQY1(Y-R)14a | 6   | 16 | RxY |
| M.A.R. | 3/8/15 | AQY1(Y-R)14b | 5   | 16 | RxY |
| M.A.R. | 3/8/15 | AQY1(Y-R)14c | 6   | 16 | RxY |
| M.A.R. | 3/8/15 | AQY1(Y-R)15a | 5.5 | 16 | RxY |
| M.A.R. | 3/8/15 | AQY1(Y-R)15b | 5   | 16 | RxY |
| M.A.R. | 3/8/15 | AQY1(Y-R)15c | 5.5 | 16 | RxY |
| M.A.R. | 3/8/15 | AQY1(Y-R)16a | 6   | 16 | RxY |
| M.A.R. | 3/8/15 | AQY1(Y-R)16b | 5.5 | 16 | RxY |
| M.A.R. | 3/8/15 | AQY1(Y-R)16c | 5.5 | 16 | RxY |
| M.A.R. | 3/8/15 | AQY1(Y-R)18a | 5.5 | 16 | RxY |
| M.A.R. | 3/8/15 | AQY1(Y-R)18b | 5.5 | 16 | RxY |
| M.A.R. | 3/8/15 | AQY1(Y-R)18c | 5.5 | 16 | RxY |
| M.A.R. | 3/8/15 | AQY1(Y-R)19a | 5.5 | 16 | RxY |
| M.A.R. | 3/8/15 | AQY1(Y-R)19b | 6   | 16 | RxY |
| M.A.R. | 3/8/15 | AQY1(Y-R)19c | 5.5 | 16 | RxY |
| M.A.R. | 3/8/15 | 20dD4a_1     | 5.5 | NA | RxY |
| M.A.R. | 3/8/15 | 20dD4a_2     | 6   | NA | RxY |
| M.A.R. | 3/8/15 | 20dD4a_3     | 6   | NA | RxY |
| M.A.R. | 3/8/15 | 20dD4b_1     | 6   | NA | RxY |
| M.A.R. | 3/8/15 | 20dD4b_2     | 5.5 | NA | RxY |
| M.A.R. | 3/8/15 | 20dD4b_3     | 6   | NA | RxY |
| M.A.R. | 3/8/15 | 20dD4c_1     | 6   | NA | RxY |
| M.A.R. | 3/8/15 | 20dD4c_2     | 6.5 | NA | RxY |

|        |          |              |     |    |     |
|--------|----------|--------------|-----|----|-----|
| M.A.R. | 3/8/15   | 20dD4c_3     | 6   | NA | RxY |
| M.A.R. | 3/8/15   | MKT1(B-Y)15a | 7   | 14 | BxY |
| M.A.R. | 3/8/15   | MKT1(B-Y)15b | 6.5 | 14 | BxY |
| M.A.R. | 3/8/15   | MKT1(B-Y)17a | 6.5 | 14 | BxY |
| M.A.R. | 3/8/15   | MKT1(B-Y)17b | 6.5 | 14 | BxY |
| M.A.R. | 3/8/15   | 22F2B2s_a1   | 7.5 | NA | BxY |
| M.A.R. | 3/8/15   | 22F2B2s_a2   | 7.5 | NA | BxY |
| M.A.R. | 3/8/15   | 22F2B2s_a3   | 7   | NA | BxY |
| M.A.R. | 3/8/15   | 22F2B2s_b1   | 7.5 | NA | BxY |
| M.A.R. | 3/8/15   | 22F2B2s_b2   | 7.5 | NA | BxY |
| M.A.R. | 3/8/15   | 22F2B2s_b3   | 7.5 | NA | BxY |
| RH     | 7/2/14   | MKT1(B)a     | 6   | 14 | BxY |
| RH     | 7/2/14   | MKT1(B)b     | 6   | 14 | BxY |
| RH     | 7/2/14   | MKT1(B)c     | 6   | 14 | BxY |
| RH     | 7/2/14   | MKT1(Y)a     | 7   | 14 | BxY |
| RH     | 7/2/14   | MKT1(Y)b     | 7   | 14 | BxY |
| RH     | 7/2/14   | MKT1(Y)c     | 7   | 14 | BxY |
| RH     | 7/26/14  | AQY1(B)1     | 6.3 | 16 | BxY |
| RH     | 7/26/14  | AQY1(B)2     | 7   | 16 | BxY |
| RH     | 7/26/14  | AQY1(B)3     | 7   | 16 | BxY |
| RH     | 7/26/14  | AQY1(Y)1     | 5.9 | 16 | BxY |
| RH     | 7/26/14  | AQY1(Y)2     | 6   | 16 | BxY |
| RH     | 7/26/14  | AQY1(Y)3     | 5.7 | 16 | BxY |
| RH     | 11/19/14 | AQY1(R)a     | 5.5 | 16 | RxY |
| RH     | 11/19/14 | AQY1(R)b     | 6   | 16 | RxY |
| RH     | 11/19/14 | AQY1(R)c     | 6.5 | 16 | RxY |
| RH     | 11/19/14 | AQY1(Y)a     | 5   | 16 | RxY |
| RH     | 11/19/14 | AQY1(Y)b     | 5.5 | 16 | RxY |
| RH     | 11/19/14 | AQY1(Y)c     | 5.5 | 16 | RxY |
| RH     | 11/19/14 | MRP13(B)a    | 5   | 7  | BxY |
| RH     | 11/19/14 | MRP13(B)b    | 4.5 | 7  | BxY |
| RH     | 11/19/14 | MRP13(B)c    | 5   | 7  | BxY |
| RH     | 11/19/14 | MRP13(Y)a    | 4.5 | 7  | BxY |
| RH     | 11/19/14 | MRP13(Y)b    | 4.5 | 7  | BxY |
| RH     | 11/19/14 | MRP13(Y)c    | 5   | 7  | BxY |
| RH     | 6/14/14  | SDP1(B)aa    | 6   | 9  | BxY |
| RH     | 6/14/14  | SDP1(B)ab    | 6   | 9  | BxY |
| RH     | 6/14/14  | SDP1(B)ac    | 6   | 9  | BxY |
| RH     | 6/14/14  | SDP1(B)ba    | 6   | 9  | BxY |
| RH     | 6/14/14  | SDP1(B)bb    | 6   | 9  | BxY |
| RH     | 6/14/14  | SDP1(B)bc    | 6   | 9  | BxY |

|    |       |           |   |   |     |
|----|-------|-----------|---|---|-----|
| RH | 41804 | SDP1(B)ca | 6 | 9 | BxY |
| RH | 41804 | SDP1(B)cb | 6 | 9 | BxY |
| RH | 41804 | SDP1(B)cc | 6 | 9 | BxY |
| RH | 41804 | SDP1(Y)aa | 6 | 9 | BxY |
| RH | 41804 | SDP1(Y)ab | 6 | 9 | BxY |
| RH | 41804 | SDP1(Y)ac | 6 | 9 | BxY |
| RH | 41804 | SDP1(Y)ba | 6 | 9 | BxY |
| RH | 41804 | SDP1(Y)bb | 6 | 9 | BxY |
| RH | 41804 | SDP1(Y)bc | 6 | 9 | BxY |
| RH | 41804 | SDP1(Y)ca | 6 | 9 | BxY |
| RH | 41804 | SDP1(Y)cb | 6 | 9 | BxY |
| RH | 41804 | SDP1(Y)cc | 6 | 9 | BxY |

\*20dD4 is the F<sub>2</sub>B<sub>3</sub> RMxYPSxYPS strain in which M.A.R. was performed on *AEP3* and *AQY1*, 29gC1 is the F<sub>2</sub>B<sub>3</sub> BYxYPSxYPS strain in which M.A.R. was performed on *SDP1*, *MMS21*, *MRP13* and *AQY1*, 16eD7 is the F<sub>2</sub>B<sub>3</sub> RMxYPSxRM strain in which M.A.R. was performed on *CTT1*, while 22F2B2s is the F<sub>2</sub>B<sub>2</sub> BYxYPSxBY strain in which M.A.R. was performed on *MKT1*; these 4 strains served as controls for the allele swaps that were performed in them.

**Table S4.** Phenotype and normalized OD600 data for a representative panel of 48 F<sub>2</sub>B<sub>3</sub> segregants screened for high resistance to hydrogen peroxide exposure.

| <b>Well *</b> | <b>MIC (mM)</b> | <b>OD600 **</b> |
|---------------|-----------------|-----------------|
| A1            | 8.5             | 0.253           |
| A2            | 8.5             | 0.218           |
| A3            | 8               | 0.233           |
| A4            | 8.5             | 0.222           |
| A5            | 8.5             | 0.237           |
| A6            | 6               | 0.221           |
| B1            | 8               | 0.235           |
| B2            | 7               | 0.211           |
| B3            | 6.5             | 0.234           |
| B4            | 8.5             | 0.232           |
| B5            | 7               | 0.21            |
| B6            | 6               | 0.244           |
| C1            | 7.5             | 0.228           |
| C2            | 6.5             | 0.204           |
| C3            | 8.5             | 0.229           |
| C4            | 7               | 0.231           |
| C5            | 8.5             | 0.212           |
| C6            | 7               | 0.242           |
| D1            | 6.5             | 0.244           |
| D2            | 8.5             | 0.218           |
| D3            | 6.5             | 0.252           |
| D4            | 7               | 0.209           |
| D5            | 5.5             | 0.213           |
| D6            | 8               | 0.249           |
| E1            | 6               | 0.253           |
| E2            | 7               | 0.216           |
| E3            | 7               | 0.26            |
| E4            | 7               | 0.283           |
| E5            | 7               | 0.255           |
| E6            | 6               | 0.238           |
| F1            | 6               | 0.204           |
| F2            | 7.5             | 0.233           |
| F3            | 6               | 0.218           |
| F4            | 8.5             | 0.214           |
| F5            | 7               | 0.219           |
| F6            | 6.5             | 0.277           |
| G1            | 7               | 0.305           |
| G2            | 7.5             | 0.238           |



|        |     |       |
|--------|-----|-------|
| G3     | 6   | 0.219 |
| G4     | 6   | 0.22  |
| G5     | 7   | 0.196 |
| G6     | 6   | 0.195 |
| H1     | 6   | 0.262 |
| H2     | 6   | 0.23  |
| H3     | 7   | 0.226 |
| H4     | 7.5 | 0.198 |
| H5     | 7   | 0.198 |
| H6 *** | 8   | 0.274 |

\* The  $F_2B_3$  segregants screened in this panel are from the (RxY Seg3)xY family.

\*\* O.D. 600 data was generated using a BioTek ELx808 plate reader. Wells with only media were used as blanks.

\*\*\* This position contains the  $F_2$  from which this family was derived.

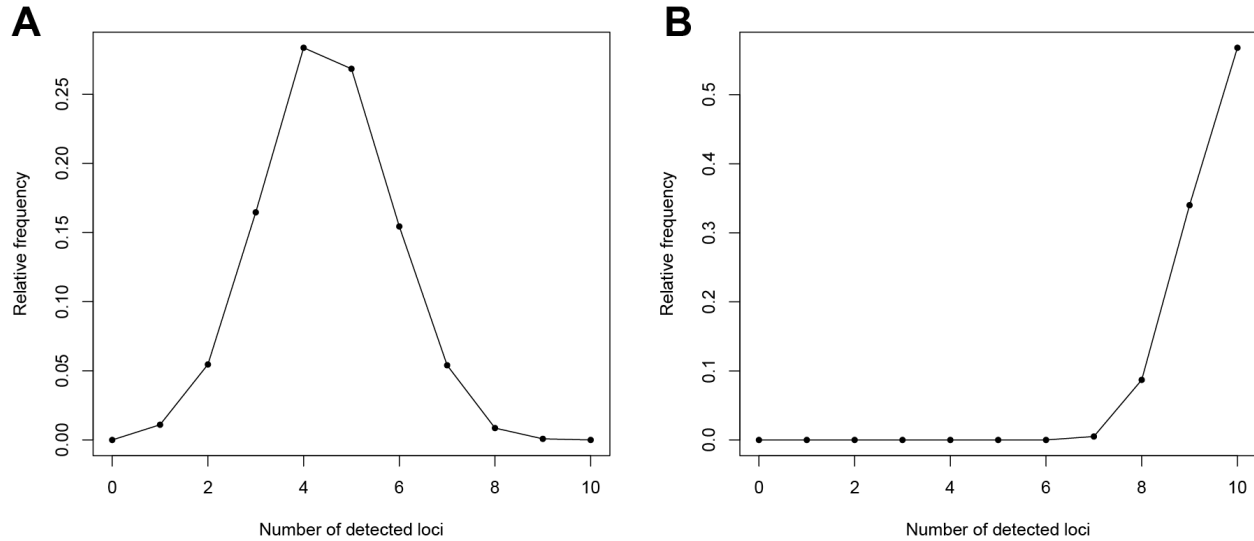

**Note S1. Statistical power of the genetic mapping strategy in this paper.** We simulated the genetic mapping strategy described in this paper under a commonly used genetic architecture model: 10 additive loci with equal effects that collectively explain half of the phenotypic variance. The other half of the phenotypic variance was attributed to random environmental effects. In these simulations, we generated 900  $F_2$  progeny from a cross. We then picked the most resistant  $F_2$  and backcrossed it, examining 100 offspring from the first backcross. The second backcross was repeated in the same manner as the first backcross. Finally, in the third backcross, we examined 700 total individual and tested whether we detected segregating loci using a binomial test applied to allele frequencies in the 15 most resistant  $F_2B_3$ s. 5,000 individual  $F_2B_3$  families and 1,000 sets of five  $F_2B_3$  families were simulated. We describe these results in two ways: the number of the 10 loci that were detected in single  $F_2B_3$  families (A) and the total number of the 10 loci that were detected at least once in five replicate  $F_2B_3$  families descended from the same  $F_2$  cross (B). As shown in A, 4 or 5 loci are typically identified in individual  $F_2B_3$  families, though a range between 1 and 9 was seen. In contrast, when five  $F_2B_3$  families were generated from the same  $F_2$  cross, more than half of the time, all of the detected loci were identified at least once. These results imply that although individual  $F_2B_3$  families provide lower statistical power than other mapping strategies (see Ehrenreich et al. 2010. *Nature*. and Bloom et al. 2013. *Nature*), statistical power can be recovered by conducting the procedure multiple times in parallel, as we have done in the current paper. When multiple  $F_2B_3$  families are generated, the statistical power of our method can approach 100% under the model we have employed.

**Note S2.** We observed karyotype instability in  $F_2B_3$  families derived from one of the  $BY \times YPS$   $F_2$  segregants. Each segregant in this family possessed different combinations of aneuploidies, which precluded efforts to perform genetic mapping. We also found that aneuploidy had occurred at some stage of advanced backcrossing for  $F_2B_3$  segregants derived from one  $BY \times RM$  and two other  $BY \times YPS$   $F_2$ s. This was identified because both alleles at certain loci were detectable in the backcross families, as highlighted by the asterisks in Figure S2. However, sequencing data showed that these  $F_2B_3$ s were entirely haploid; thus, these individuals were included in our analyses.
